# Supplementary material for: Insights into particulate matter pollution in the North China Plain during wintertime: Local contribution or regional transport?
Source: Copernicus journal article supplement (doi:10.5194/acp-2020-597), 2020-07-14
Supplement: Supplementary file [file acp-2020-597-RC2-supplement.pdf]

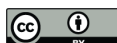

Jiarui Wu<sup>1,4</sup>, Naifang Bei<sup>2</sup>, Yuan Wang<sup>3</sup>, Xia Li<sup>1,4</sup>, Suixin Liu<sup>1,4</sup>, Lang Liu<sup>1,4</sup>, Ruonan Wang<sup>1,4</sup>, Jiaoyang Yu<sup>1</sup>, Min Zuo<sup>1,4</sup>, Zhenxing Shen<sup>2</sup>, Junji Cao<sup>1,4</sup>, Xuexi Tie<sup>1</sup>, and Guohui Li<sup>1,4\*</sup>

<sup>2</sup>School of Human Settlements and Civil Engineering, Xi'an Jiaotong University, Xi'an, 710049, China

<sup>4</sup>CAS Center for Excellence in Quaternary Science and Global Change, Xi'an, 710061, China

\*Correspondence to: Guohui Li ([ligh@ieecas.cn](mailto:ligh@ieecas.cn))

38

39



## 40 1 Introduction

41 As the most polluted area in China, the North China Plain (NCP) has been suffering  
42 severe particulate pollution for recent decades, particularly during wintertime, caused by a  
43 synergy of local emissions, trans-boundary transport, specific topography, and unfavorable  
44 meteorological situations (Long et al., 2016; Wu et al., 2017; An et al., 2019; Wu et al., 2020).  
45 In recent years, China government has carried out aggressive emission mitigation measures to  
46 reduce particulate matter (PM) pollution (Zheng et al., 2018; Zhang et al., 2019), but heavy  
47 haze with high PM<sub>2.5</sub> (fine PM) concentrations still frequently engulfs the area. It is  
48 controversial on whether local emissions or trans-boundary transport dominates the PM  
49 pollution in the NCP, especially in Beijing (Guo et al., 2014; Li et al., 2015; Zhang et al., 2015;  
50 Wu et al., 2017; Zamora et al., 2019). Therefore, accurate identification and quantitative  
51 source apportionment (SA) of PM<sub>2.5</sub> are imperative to provide scientific reference for  
52 instituting air quality control strategies as well as constitute an important prerequisite to  
53 reduce PM pollution in the NCP.

54 The observation based SA techniques, such as chemical mass balance (CMB) and  
55 positive matrix factorization (PMF) methods, are traditionally used to quantify the particle  
56 contribution of each source (Cooper and Watson, 1980; Paatero and Tapper, 1993), but  
57 cannot identify the source contribution of secondary transformation to particulate matters.  
58 The brute force method (BFM) is the simplest model based SA method using air quality  
59 models (AQMs) through zeroing out emissions from a specific source (Marmur et al., 2005).  
60 The BFM can assess the importance of each emission source, but has flaws in quantifying the  
61 source contribution due to lack of consideration of the complicated non-linear interaction  
62 between various sources (Zhang and Ying, 2011). At present, the widely used SA technique  
63 based on AQMs is the reactive tracer method or the source-oriented AQMs (Marmur et al.,  
64 2006; Ying and Kleeman, 2006; Ying et al., 2008a; Ying et al., 2008b; Zhang and Ying, 2010,

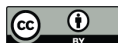

2011; Burr and Zhang, 2011; Zhang et al., 2014). The method adds reactive tracers or tagged species in AQMs to trace the atmospheric transport, transformation, and deposition of air pollutants emitted from specific sources and quantify the source contribution according to the mass conservation (Wagstrom et al., 2008; Wang et al., 2009).

The observation based SA method or the BFM based on AQMs has been used to evaluate  $PM_{2.5}$  contributions of local emissions and trans-boundary transport in the NCP, especially in Beijing-Tianjin-Hebei (BTH). Chang et al. (2019) have investigated the contribution of trans-boundary transport to the  $PM_{2.5}$  concentration in 13 cities of the BTH, showing that Shandong province has a considerable  $PM_{2.5}$  contribution to most cities in BTH, followed by Henan among the four neighboring provinces. Dong et al. (2020) have also found that the regional transport contributes about 32.5%-68.4% of  $PM_{2.5}$  concentrations in BTH in 2017. However, the contribution of local emissions or trans-boundary transport to Beijing's PM pollution still remains uncertain. Lang et al. (2013) have indicated that regional transport accounts for 54.6% of  $PM_{2.5}$  concentrations during the polluted episode in Beijing, with annual  $PM_{2.5}$  contribution of 42.4% on average using the observation and MM5-CMAQ model results. Wu et al. (2017) have shown that non-Beijing emissions contribute 61.5% of  $PM_{2.5}$  mass during haze events in summer. However, some studies have emphasized that the severe haze formation occurred in Beijing is mainly controlled by the efficient local aerosol nucleation and growth, whereas the  $PM_{2.5}$  contribution of regional transport might not be significant (Guo et al., 2014; Zamora et al., 2019). Meng et al. (2020) found that the regional transport from Hebei and Shandong plays an important role in the PM pollution in Tianjin, with the average  $PM_{2.5}$  contribution of 44% during the wintertime, but the local contribution gradually dominates with continuous deterioration of the PM pollution. Wang et al. (2015) have concluded that regional transport plays a non-negligible role in the top three polluted cities in Hebei using the BFM method, with  $PM_{2.5}$  contributions of 27.9% in Shijiazhuang,

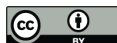

46.6% in Xingtai, and 40.4% in Handan. However, Wang et al. (2019) have proposed that local emissions are the main contributor to the air pollution in Hebei. Liu et al. (2017) have emphasized that the contribution of regional transport to the PM pollution in Henan is significant during the wintertime, with the average  $PM_{2.5}$  contribution of 11.95%, 11.69%, 7.95%, and 7.4% from BTH, Anhui, Jiangsu, and Shandong, respectively. It is obvious that whether local contribution or regional transport is dominant during the PM pollution in the NCP is still uncertain.

In this study, a source-oriented WRF-Chem model is developed to comprehensively quantify the contribution of local emissions and trans-boundary transport to the PM pollution in the NCP, including Beijing, Tianjin, Hebei, Henan, and Shandong, as well as the adjacent province on the west, Shanxi, under different pollution levels during the wintertime in 2015.

101

## 2 Model and methodology

### 2.1 WRF-Chem model and configurations

The source-oriented AQM used in the study is based on the WRF-Chem model (Version 3.5) (Grell et al., 2005) with modifications by Li et al. (2010, 2011a, 2011b). The modified WRF-Chem model includes a new flexible gas phase chemical module that can be used with different chemical mechanisms and the CMAQ aerosol module (AERO5) developed by EPA (Binkowski and Roselle, 2003; Foley et al., 2010). The wet deposition is based on the method in the CMAQ module and the dry deposition of chemical species follows Wesely (1989). The photolysis rates are calculated using the Fast Tropospheric Ultraviolet and Visible (FTUV) Radiation Model with the aerosol and cloud effects on photolysis (Li et al., 2005; Li et al., 2011a). The inorganic aerosols are predicted using ISORROPIA Version 1.7, calculating the composition and phase state of an ammonium-sulfate-nitrate-water inorganic aerosol in thermodynamic equilibrium with gas phase precursors (Nenes et al., 1998). The

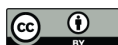

secondary organic aerosols (SOA) are calculated using the volatility basis-set (VBS) modeling method, with contributions from glyoxal and methylglyoxal. Detailed information can be found in Li et al. (2010, 2011a, 2011b). Figure 1 shows the simulation domain and detailed model configuration can be found in Table 1.

## 2.2 Source-Oriented WRF-Chem model

In the source-oriented WRF-Chem model, the SAPRC-99 photochemistry mechanism (Carter, 2010) and CMAQ aerosol module (AERO5) (Foley et al., 2010) are modified so that the precursors of aerosols from different sources and their corresponding reaction products are treated as different species and tracked independently in chemical, physical, and dynamic processes. It is worth noting that the tagged species have exactly identical physical and chemical properties as the original ones.

Black carbon and unspecified species (mainly mineral dust) from each source are tagged and only tracked in processes of transport, dispersion, and wet/dry deposition since they do not involve in photochemistry and gas-to-particle partitioning. For the inorganic aerosols (sulfate, nitrate, and ammonium) and organic aerosols (primary and secondary organic aerosols, i.e., POA and SOA), their precursors from each source and corresponding reaction products are treated as different species and simulated in the SAPRC-99 photochemistry mechanism and traced in processes of transport, dispersion, and wet/dry deposition as well as gas-to-particle partitioning. A non-hardwired gas phase chemical module is used to solve the SAPRC-99 photochemistry based on the Eulerian backward Gauss-Seidel iterative technique (Hess et al., 2000; Li et al., 2010). The module is flexible to include a new gas-phase species and its corresponding photochemical reactions.

The ISORROPIA is used to distribute the  $\text{NH}_3$ /ammonium,  $\text{HNO}_3$ /nitrate, and water between the gas and aerosol phases as a function of total sulfate, total ammonia, total nitrate, relative humidity and temperature (Nenes et al., 1998). Therefore, as a bulk method, the



ISORROPIA cannot be applied to distribute the gas and aerosol phase for the inorganic aerosol from each source separately because of the interaction among various sources.

Except primary emissions, the SA for sulfate aerosols needs to be considered in the homogenous and heterogeneous formation pathways. The sulfate growth from the gas-phase  $\text{SO}_2$  oxidation is contributed by the  $\text{H}_2\text{SO}_4$  involved nucleation and condensation, which are determined by the  $\text{H}_2\text{SO}_4$  formation rate in the atmosphere. At time ( $t$ ), after one time step ( $\delta t$ ) integration, the conceptual scheme of the source-oriented sulfate gas-phase formation is shown in Figure 2a. In this study, the heterogeneous conversion of  $\text{SO}_2$  is parameterized as the  $\text{SO}_2$  oxidation involving aerosol water by  $\text{O}_2$  catalyzed by  $\text{Fe}^{3+}$ . Figure 2b presents the sulfate SA for the heterogeneous formation. The SA for nitrate and ammonium aerosols follows the mass conversion of  $\text{N}(+\text{VI})$  and  $\text{N}(-\text{III})$  from each source, respectively, when the total ammonia and nitrate are distributed between the gas and aerosol phases by the ISORROPIA after one time step integration, as shown in Figure 3.

Organic aerosols are simulated using a non-traditional SOA module based on the volatility basis set (VBS) method, in which all primary species are treated as chemically reactive and distributed in logarithmically spaced volatility bins (Donahue et al., 2006; Robinson et al., 2007). Nine surrogate species with saturation concentration ranging from  $10^{-2}$  to  $10^6 \mu\text{g m}^{-3}$  at room temperature are considered to represent POA compositions (Shrivastava et al., 2008). The SOA formation from anthropogenic or biogenic precursors is predicted using four semi-volatile organic compounds (SVOCs) whose effective saturation concentrations at room temperature are 1, 10, 100, and  $1000 \mu\text{g m}^{-3}$ , respectively (Tsimpidi et al., 2010). The SOA formation includes the following pathways: (1) the oxidation of VOCs emitted from anthropogenic and biogenic sources, (2) intermediate VOCs (IVOCs) co-emitted with POA but are never in the particle phase during the emissions process oxidized by OH, and (3) primary organic gases (POG) emitted or formed due to evaporation



of POA assumed to react with OH radicals to reduce their volatility and hence to partition between gas and particle phase forming SOA (Odum et al., 1996; Pankow, 1994; Lipsky and Robinson, 2006; Robinson et al., 2007; Shrivastava et al., 2006). The VBS method is in principle source-oriented, which can be used to trace the OA formation from various sources. Therefore, when considering SA for organic aerosols, we just need to treat all the SOA and POA as well as their corresponding gas-phase organics from each emission source as the VBS input, as shown in Figure 4a. For the heterogeneous pathway, the SOA formation from glyoxal and methyglyoxal is parameterized as a first-order irreversible uptake on aerosol or cloud droplet surfaces with a reactive uptake coefficient of  $3.7 \times 10^{-3}$  (Volkamer et al., 2007; Zhao et al., 2006). The SA for heterogeneous SOA formation is shown in Figure 4b, which is similar to that for heterogeneous sulfate formation.

### 2.3 Data and statistical methods for comparisons

The model performance in simulating  $\text{PM}_{2.5}$ ,  $\text{O}_3$ ,  $\text{NO}_2$ ,  $\text{SO}_2$ , and CO is validated using the hourly observations released by Ministry of Ecology and Environment of China (China MEP). In addition, the predicted submicron sulfate, nitrate, ammonium, and organic aerosols are compared to measurements by the Aerodyne Aerosol Chemical Speciation Monitor (ACSM), which is deployed at the National Center for Nanoscience and Technology (NCNST), Chinese Academy of Sciences in Beijing (Figure 1). The primary organic aerosol (POA) and SOA concentrations are obtained from the ACSM measurement analyzed using the positive matrix factorization (PMF).

In the present study, the mean bias (*MB*), root mean square error (*RMSE*) and the index of agreement (*IOA*) are used as indicators to evaluate the performance of the RF-Chem model. *IOA* describes the relative difference between the model and observation, ranging from 0 to 1, with 1 indicating perfect agreement.

$$MB = \frac{1}{N} \sum_{i=1}^N (P_i - O_i)$$



$$RMSE = \left[ \frac{1}{N} \sum_{i=1}^N (P_i - O_i)^2 \right]^{\frac{1}{2}}$$

$$IOA = 1 - \frac{\sum_{i=1}^N (P_i - O_i)^2}{\sum_{i=1}^N (|P_i - \bar{P}| + |O_i - \bar{O}|)^2}$$

Where  $P_i$  and  $O_i$  are the predicted and observed pollutant concentrations, respectively.  $N$  is the total number of the predictions used for comparisons, and  $\bar{P}$  and  $\bar{O}$  represents the average of the prediction and observation, respectively.

195

### 196 3 Results and discussions

#### 197 3.1 Model performance

Figure 5 shows the diurnal profiles of observed and simulated near-surface  $PM_{2.5}$ ,  $O_3$ ,  $NO_2$ ,  $SO_2$  and CO concentrations averaged at monitoring sites in the NCP from 05 December 2015 to 04 January 2016. The model generally performs well in reproducing the temporal variation of  $PM_{2.5}$  concentrations in the NCP, with an  $IOA$  of 0.96, but slightly overestimates  $PM_{2.5}$  concentrations against measurements, with a  $MB$  of  $2.2 \mu g m^{-3}$ . The diurnal  $O_3$  variation is successfully replicated by the model, such as peak afternoon  $O_3$  concentrations caused by active photochemistry and low nighttime  $O_3$  concentrations due to the  $NO_x$  titration, with an  $IOA$  of 0.88. However, the model is subject to underestimating the  $O_3$  concentration compared to measurements, particularly during nighttime, with a  $MB$  of  $-5.9 \mu g m^{-3}$ . The model also reasonably well reproduces the  $NO_2$  diurnal profiles with peaks in the evening, with an  $IOA$  of 0.89 and a  $MB$  of  $0.5 \mu g m^{-3}$ , but considerable overestimations or underestimations still exist. The model generally tracks reasonably the temporal variation of  $SO_2$  concentrations against observations, with an  $IOA$  of 0.76. However, the biases for the  $SO_2$  simulation are also large considering that  $SO_2$  is mainly emitted from point sources and its simulations are more sensitive to the wind field uncertainties (Bei et al., 2017). Compared with measurements, the temporal profile of the near-surface CO concentration in the NCP is





well simulated, with the *IOA* and *MB* of 0.90 and  $0.0 \mu\text{g m}^{-3}$ , respectively.

Figure 6 shows the spatial pattern of simulated and observed average near-surface concentrations of  $\text{PM}_{2.5}$ ,  $\text{O}_3$ ,  $\text{NO}_2$ , and  $\text{SO}_2$  along with simulated winds during the episode in the NCP. The simulated air pollutants distributions are generally in good agreement with observations, although the model biases still exist. During the haze episode, the simulated weak or calm winds are favorable for accumulation of air pollutants, leading to formation of the serious air pollution in the NCP. The simulated average near-surface  $\text{PM}_{2.5}$  concentrations during the episode are more than  $115 \mu\text{g m}^{-3}$  in the NCP, which is consistent with observations. The simulated and observed average  $\text{O}_3$  concentrations during the episode are not high, generally less than  $40 \mu\text{g m}^{-3}$ . The low  $\text{O}_3$  concentration during the episode is chiefly caused by the slow photochemical activities due to weak wintertime insolation which is further attenuated by clouds and aerosols and the resultant titration of high  $\text{NO}_x$  emissions (Li et al., 2018). The observed and calculated average  $\text{NO}_2$  and  $\text{SO}_2$  concentrations are still high in the NCP, varying from 30 to  $100 \mu\text{g m}^{-3}$  and 20 to  $100 \mu\text{g m}^{-3}$ , respectively, although strict emission mitigation measures have been carried out since 2013. Interestingly, the simulated  $\text{SO}_2$  concentrations in cities and their surrounding areas are very high, but the simulated  $\text{NO}_2$  concentrations present uniform distribution in the NCP, indicating the substantial contribution of  $\text{NO}_x$  area sources.

Figure 7 provides the temporal variations of simulated and observed aerosol species at NCNST in Beijing during the episode. Generally, the model predicts reasonably the temporal variations of the aerosol species against the measurements. The model yields the major peaks of the POA concentration compared to observations in Beijing, but frequently underestimates or overestimates the POA concentration, with an *IOA* of 0.80 and a *MB* of  $-2.0 \mu\text{g m}^{-3}$ . As a primary species, the POA in Beijing is determined by local emissions and regional transport outside of Beijing during haze days, so uncertainties from emissions and meteorological



239 fields have large potential to influence POA simulations (Bei et al., 2017). Although the VBS  
240 modeling method is used and contributions from glyoxal and methylglyoxal are included in  
241 the study, the model still has difficulties in simulating the SOA concentrations, with the *IOA*  
242 and *MB* of 0.67 and -10.5  $\mu\text{g m}^{-3}$ , respectively. Except the SOA formation and transformation  
243 mechanism in the atmosphere, which remains elusive, many factors have potentials to affect  
244 the SOA simulation, such as meteorology, measurements, precursor emissions, and SOA  
245 treatments (Li et al., 2011). The model reasonably reproduces the sulfate temporal variation  
246 compared to measurements, and the *MB* and *IOA* are -3.5  $\mu\text{g m}^{-3}$  and 0.87, respectively. The  
247 model also performs well in simulating the nitrate and ammonium concentrations against  
248 measurements in Beijing, with *IOAs* of 0.92 and 0.88, respectively.

249 Generally, the model simulates well the spatial distribution and temporal variation of air  
250 pollutants in the NCP, and the predicted aerosol species are also consistent well with the  
251 measurements in Beijing. Good model performance in simulating air pollutants and aerosol  
252 species provides a reliable base for quantifying contributions of local and non-local emissions  
253 to the PM pollution in the NCP.

### 254 3.2 Source apportionment of the PM pollution in the NCP

255 We have marked the emitted precursors in six provinces, including Beijing, Tianjin,  
256 Hebei, Henan, Shandong, and Shanxi in simulations of the source-oriented WRF-Chem  
257 model (Figure 1). Additionally, the boundary transport and emissions from the region except  
258 the six provinces are taken as the background source. Therefore,  $\text{PM}_{2.5}$  contributions of the  
259 non-local emission for each of the six provinces include those transported from the other five  
260 provinces and the background source.

261 Figure 8 shows the average  $\text{PM}_{2.5}$  contribution of emissions from the six provinces  
262 during the study episode. Apparently, emissions from the six provinces influence the  $\text{PM}_{2.5}$   
263 level in the whole NCP, showing necessity of collaborative emission mitigation to reduce PM



264 pollution. Emissions of Hebei, Henan, and Shandong not only significantly deteriorate the  
265 local PM pollution, with  $\text{PM}_{2.5}$  contributions ranging from 50 to over  $100 \mu\text{g m}^{-3}$  of  
266 considerably enhance the  $\text{PM}_{2.5}$  level in their surrounding areas by about  $5\sim 50 \mu\text{g m}^{-3}$ .  
267 Emissions of Beijing and Tianjin increase the local  $\text{PM}_{2.5}$  concentrations by  $10\sim 100 \mu\text{g m}^{-3}$ ,  
268 and contribute about  $3\sim 10 \mu\text{g m}^{-3}$   $\text{PM}_{2.5}$  to their surrounding areas. Due to blocking of  
269 mountains,  $\text{PM}_{2.5}$  contributions of the Shanxi emission to the NCP is not significant, ranging  
270 from 3 to  $20 \mu\text{g m}^{-3}$ .

271 Beijing is surrounded from the southwest to the northeast by the Taihang Mountains and  
272 the Yanshan Mountains and open to the NCP in the south and east. During haze events,  
273 southerly or easterly winds are generally prevailed in the NCP, facilitating transport of air  
274 pollutants emitted from the NCP to Beijing and further accumulation due to the mountain  
275 blocking (Long et al., 2016). During the study episode, the average simulated  $\text{PM}_{2.5}$   
276 concentration in Beijing is around  $125.3 \mu\text{g m}^{-3}$ , in which the contribution of local emissions  
277 is 36.3%. The remaining 63.7% of  $\text{PM}_{2.5}$  concentrations in Beijing is accounted for by  
278 non-Beijing emissions, showing that Beijing's air quality is dominated by non-Beijing  
279 emissions during the PM pollution episode. The  $\text{PM}_{2.5}$  contribution of Hebei emissions to  
280 Beijing is 24.6%, greater than those of Shandong (8.3%), Tianjin (7.4%), Henan (3.6%), and  
281 Shanxi (3.3%). The background source contributes about 16.5% of the  $\text{PM}_{2.5}$  mass in Beijing  
282 on average. Overall, the contribution of emissions from Beijing's five surrounding provinces  
283 to the  $\text{PM}_{2.5}$  mass is 47.2%, exceeding that of local emissions, indicating the importance of  
284 the trans-boundary transport of air pollutants in the haze formation in Beijing. Adjacent to  
285 Beijing, the Tianjin's air quality is also dominated by trans-boundary transport of air  
286 pollutants. The average  $\text{PM}_{2.5}$  contribution of non-local emissions is 76.2%, in which Hebei,  
287 Shandong, Beijing, Henan, and Shanxi accounts for 29.3%, 11.7%, 8.0%, 4.0%, and 3.0%,  
288 respectively. The  $\text{PM}_{2.5}$  contribution of local emissions in Hebei, Henan, and Shanxi is

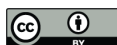

almost as much as that of trans-boundary transport, with the average of 50.2%, 45.7%, and 49.2%, respectively. The Shandong emissions play an important role in the air quality in Hebei and Henan, with  $PM_{2.5}$  contributions of about 15%. Moreover, the Shandong's air quality is primarily determined by emissions of itself, with an average  $PM_{2.5}$  contribution of 64.9%. Emissions of Beijing, Tianjin, Hebei, Henan, and Shanxi contribute less than 8% of the  $PM_{2.5}$  mass in Shandong. The background source makes up approximately 20.1%, 11.4%, 16.8%, 11.4%, and 21.8% of the  $PM_{2.5}$  mass in Tianjin, Hebei, Henan, Shandong, and Shanxi, respectively.

Previous studies have shown that there exist large uncertainties in the contribution of local emissions or trans-boundary transport to Beijing's PM pollution (Guo et al., 2010; Guo et al., 2014; Li et al., 2015; Zhang et al., 2015; Wu et al., 2017). We further evaluate the contribution of local and non-local emissions to the  $PM_{2.5}$  mass in Beijing under different pollution levels, as well as in the other five provinces. The simulated hourly near-surface  $PM_{2.5}$  mass concentrations in Beijing during the whole episode are first subdivided into 6 bins based on the air quality standard in China for  $PM_{2.5}$ , i.e., 0~35 (excellent), 35~75 (good), 75~115 (lightly polluted), 115~150 (moderately polluted), 150~250 (heavily polluted), and exceeding 250 (severely polluted)  $\mu g m^{-3}$  (Feng et al., 2016).  $PM_{2.5}$  contributions from local emissions and the other five provinces as well as background source to Beijing are assembled separately as the bin  $PM_{2.5}$  concentrations following the grid cells, and an average of  $PM_{2.5}$  contributions from each source in each bin is calculated. The same method is also used for the other five provinces.

Table 2, Table 3 and Figure 9 present the average percentage contribution of local and non-local emissions to the  $PM_{2.5}$  concentrations in Beijing, Tianjin, Hebei, Henan, Shandong, and Shanxi during the episode under different pollution levels. The local emission dominates the  $PM_{2.5}$  mass when the air quality is excellent and good in Beijing, with the average



contribution of 56.8% and 55.0%, respectively. Moreover, the  $PM_{2.5}$  contribution of local emissions decreases with the deterioration of the air quality in Beijing, with an average contribution of 48.7%, 40.5%, 35.4%, and 25.1%, respectively, when the air quality is slightly, moderately, heavily, and severely polluted. Therefore, non-local emissions play a dominant role in Beijing's PM pollution, particularly when the air quality is severely polluted, non-local emissions contribute around 75% of the  $PM_{2.5}$  mass in Beijing. With the excellent and good air quality in Beijing, the contribution of emissions from the other five provinces is 22.4% and 29.5%, respectively, much less than those of local emissions. However, the contribution increases from 37.6% to 54.3% with deterioration of Beijing's air quality from being slightly to severely polluted. The result is consistent with that from Lang et al. (2013), reporting that regional transport accounts for 54.6% of the  $PM_{2.5}$  mass in Beijing during a PM pollution episode. Additionally, Jiang et al. (2015) have concluded that the transport from the environs of Beijing contributes about 55% of the peak  $PM_{2.5}$  concentration in the city during a severe PM pollution episode occurred in December 2013. Wu et al. (2017) have also shown that 61.5% of the  $PM_{2.5}$  mass in Beijing is contributed by regional transport during a summertime PM pollution episode. The contribution of Hebei emissions to the  $PM_{2.5}$  mass in Beijing is the most significant, exceeding 20% when Beijing's air quality is not excellent. The contribution of emissions from Tianjin, Henan, Shandong, and Shanxi is generally less than 10% under different pollution levels. However, when Beijing's air quality is severely polluted, the contribution of Shandong emissions is also significant, attaining 16.4%. The background source contributes more than 20% of the  $PM_{2.5}$  mass in Beijing when the air quality is excellent and severely polluted, and between 12.8% and 15.4% under the moderate pollution levels.

The air quality in Tianjin is dominated by trans-boundary transport of air pollutants, with the non-local  $PM_{2.5}$  contribution generally higher than 55%, especially when the air



quality is severely polluted, with the non-local  $\text{PM}_{2.5}$  contribution of 95.9%, which is higher than the average non-local contribution of 44% reported by Meng et al. (2020). The  $\text{PM}_{2.5}$  contribution of local emissions decreases with the deterioration of the air quality in Tianjin, with average contributions of 44.9%, 41.3%, 37.0%, and 29.6%, respectively, when the air quality is good, slightly, moderately, and heavily polluted. The Hebei emissions play a significant role in the PM pollution in Tianjin, generally contributing more than 25% of  $\text{PM}_{2.5}$  concentrations, except when the air quality is excellent. Meng et al. (2020) have emphasized the important contribution of Hebei emissions to  $\text{PM}_{2.5}$  concentrations in Tianjin. However, Meng et al. (2020) have suggested that the  $\text{PM}_{2.5}$  contribution of local emissions gradually increases with continuous deterioration of the PM pollution, which is different from that in the study. The  $\text{PM}_{2.5}$  contribution of the background source is between 11.4% to 16.5%, except when the air quality is severely polluted, with the contribution exceeding 30%.

The Hebei's air quality is obviously determined by local emissions when the air quality is excellent or good, with the average  $\text{PM}_{2.5}$  contribution of 65.8% and 60.9%, respectively. Additionally, the contribution of non-local emissions to the  $\text{PM}_{2.5}$  mass in Hebei is almost the same as that of local emissions, varying from 46.2% to 54.8% with  $\text{PM}_{2.5}$  concentrations exceeding  $75 \mu\text{g m}^{-3}$ . The  $\text{PM}_{2.5}$  contribution of emissions from Tianjin, Henan, and Shanxi is generally less than 10% under different pollution levels. However, the Shandong emissions contribute more than 10% of the  $\text{PM}_{2.5}$  mass in Hebei when the air quality becomes polluted. Obviously, with occurrence of severe PM pollution in BTH, the contribution of Shandong emissions to the  $\text{PM}_{2.5}$  mass in BTH becomes considerable, which has also been suggested by Chang et al. (2019). The  $\text{PM}_{2.5}$  contribution of background source to Hebei decreases with deterioration of the air quality, ranging from 8.2% to 19.2% during the episode. Overall, in Hebei, local emissions generally dominate the  $\text{PM}_{2.5}$  level under different pollution level, but non-local emissions play a  and more important role with deterioration of PM pollution,



364 which is consistent with se in Wang et al. (2015) and Wang et al. (2019).

365       The local and non-local emissions generally play an almost equivalent role in the air  
366 quality in Henan when the severe PM pollution does not occur. However, when the air quality  
367 is severely polluted, the non-local emissions contribute about 62% of the  $PM_{2.5}$  mass. The  
368 Shandong emissions generally contribute more  $PM_{2.5}$  mass than the other five provinces  
369 when the air quality is polluted, with the  $PM_{2.5}$  contribution exceeding 10%. The background  
370 source accounts for more than 10% with the air quality being excellent or good. In Shandong,  
371 the local emissions dominate the air quality, generally contributing more than 60% of the  
372  $PM_{2.5}$  mass. The total  $PM_{2.5}$  contribution of emissions from Beijing, Tianjin, Hebei, Henan,  
373 and Shanxi is less than 30%, and  $PM_{2.5}$  contributions of background source range from 10%  
374 to 15% under different pollution levels. The air quality in Shanxi is mainly decided by local  
375 emissions, with the  $PM_{2.5}$  contribution of 58.7%, 57.8%, 43.8%, and 47.7% when the air  
376 quality g from excellent, good, slightly, and moderately polluted, respectively. Hebei and  
377 Henan emissions contribute more than 10% and 15% of the  $PM_{2.5}$  mass in Shanxi, when the  
378 air quality is slightly and moderately polluted. The  $PM_{2.5}$  contribution of background source  
379 is notable, generally exceeding 20%.

380       Table 4, Table 5 and Figure 10 further show the average contribution of local and  
381 non-local emissions to the aerosol species in Beijing, Tianjin, Hebei, Henan, Shandong, and  
382 Shanxi during the episode. Interestingly, the local emissions dominate the  and POA in  
383 Beijing, with a contribution of 61.1% and 64.1%. Hu et al. (2015) have also revealed that  
384 local emissions constitute the major source of POA in Beijing, particularly during wintertime.  
385 Additionally, local emissions also account for around 32% of the SOA in Beijing, and the  
386 high organic aerosol contribution is likely caused by emissions of large amounts of vehicles  
387 in Beijing. Except for EC and POA, non-local emissions dominate the aerosol species  
388 concentration in Beijing, with contributions exceeding 60%, especially for sulfate and nitrate



389 in which the contribution of non-local emissions is more than 90% (Figure 10). Ying et al.  
390 (2014) have shown that the inter-regional transport of air pollutants plays an important role in  
391 the secondary aerosols formation during the polluted episode in China. Sun et al. (2016) have  
392 also demonstrated that the secondary aerosol formed on a regional scale dominates the  
393 aerosol compositions during the haze episode, with an average of 67%. Apparently, the  
394 impact of Hebei emissions on PM pollution in Beijing is the most significant, with the nitrate  
395 and ammonium contribution exceeding 40% (Table 4). Except for EC and POA,  
396 contributions of background source to the aerosol species in Beijing is generally more than  
397 10%. It is worth noting that the nitrate contribution of the background source is 32.1%, which  
398 is caused by the slow oxidation of  $\text{NO}_2$  during wintertime.

399 In Tianjin, the non-local emissions play a dominant role in concentrations SOA, sulfate,  
400 nitrate, and ammonium, with contributions of 73.6%, 68.6%, 88.7%, and 71.3%, and also  
401 account for 48.1% and 50.7% of the EC and POA mass, respectively. In general, Hebei  
402 emissions constitute the most important contributor of aerosol species in the non-local  
403 sources, followed by Shandong emissions. In Hebei, the local emissions determine the levels  
404 of EC, POA, sulfate, and ammonium, with contributions of 73.8%, 63.0%, 64.3%, and 67.4%,  
405 respectively. The SOA mass is mainly contributed by local (49.4%) and Shandong (16.7%)  
406 emissions, and background sources (11.6%). However, the non-local emissions dominate the  
407 nitrate mass in Hebei, with the contribution of 78.7%, most of which is from Henan (11.4%),  
408 Shandong (14.6%), Shanxi (10.8%), and background sources (22.9%). Except for sulfate, the  
409 aerosol species in Henan are generally controlled by local emissions, with contributions  
410 varying from 45% to 65%. The sulfate contribution of non-local emissions is 83.2%, mainly  
411 contributed by Hebei (16.7%), Shandong (14.9%), Shanxi (12.1%), and background (22%).  
412 The local emissions contribute about 60~80% of the aerosol species mass in Shandong,  
413 except nitrate aerosols, which are dominated by non-local emissions with a contribution of





414 75.1%. More than 60% of EC, POA, sulfate and ammonium in Shanxi are formed from local  
415 emissions, but the non-local emissions are the dominant contributor to SOA and nitrate  
416 concentrations.

417

#### 418 4 Summary and conclusions

419 We have developed a source-oriented WRF-Chem model, treating the precursors of  
420 aerosols from different sources and their corresponding reaction products as different species  
421 and tracked independently in chemical, physical, and dynamic processes. The model is used  
422 to evaluate contributions of local and non-local emissions to the PM pollution in the NCP,  
423 including Beijing, Tianjin, Hebei, Henan, and Shandong, as well as the adjacent province on  
424 the , Shanxi during a persistent and severe haze episode from 05 December 2015 to 04  
425 January 2016. The model exhibits good performance in predicting the temporal variation and  
426 spatial distribution of air pollutants in the NCP and also reasonably simulates the aerosol  
427 species against measurements in Beijing.

428 As two megacities in the NCP, Beijing and Tianjin have made great efforts to decrease  
429 local emissions of air pollutants since 2013, such as  replace residential coal use with gas and  
430 electricity, elevating vehicle emissions standards,  phasing out high-emitting industries, .  
431 (Zhang et al., 2019). However, heavy PM  still occur in the two cities, which is  
432 mainly  from trans-boundary transport of air pollutants. Simulations of the  
433 source-oriented WRF-Chem model reveal that,  average local and non-local emissions  
434 contribute 36.3% and 63.7% of the PM<sub>2.5</sub> mass in Beijing during the episode. When the air  
435 quality is excellent or good in terms of hourly PM<sub>2.5</sub> concentrations, the local emissions  
436 contribute more than 50% to the PM<sub>2.5</sub> mass, dominating Beijing's air quality. However, with  
437 deterioration of Beijing's air quality from being slightly to severely polluted, the PM<sub>2.5</sub>  
438 contribution of local emissions decreases from 48.7% to 25.1%, indicating the significant



439 contribution of trans-boundary transport to the PM pollution in Beijing. The non-local  
440 emissions account for 76.2% of the  $PM_{2.5}$  mass in Tianjin and the contribution exceeds 90%  
441 when the air quality is severely polluted. The  $PM_{2.5}$  concentrations in three industrialized  
442 provinces, Hebei, Shandong, and Henan in the NCP, are generally dominated by the local  
443 emissions under different pollution levels, particularly in Shandong with the  $PM_{2.5}$   
444 contribution of local emissions exceeding 60%. Efficient emission mitigations of air  
445 pollutants in the three provinces need to be carried out continuously to lower PM levels.  
446 However, when severe PM pollution occurs, the  $PM_{2.5}$  contribution of local emissions in  
447 Hebei and Henan decreases considerably. The impact of Shanxi's emissions on  $PM_{2.5}$   
448 concentrations in the NCP is generally not significant.

449 The primary aerosol species, such as EC and POA, are generally controlled by local  
450 emissions with the average contribution ranging from about 50% to 85% in the six provinces.  
451 However, the source apportionment of secondary aerosols shows large differences during the  
452 episode, with more evident regional characteristics. Local emissions contribute more than 60%  
453 of the SOA mass in Shandong, 40~50% in Hebei, Henan and Shanxi, and around 30% in  
454 Beijing and Tianjin. The sulfate contribution of local emissions is significant in Hebei,  
455 Shandong and Shanxi, exceeding 60%, but less than 10% in Beijing. Except in Henan, local  
456 emissions do not play an important role in the nitrate formation, with contributions less than  
457 30%, and most nitrate aerosols are produced during trans-boundary transport of its  
458 precursors. Ammonium aerosols in Beijing and Tianjin are mainly determined by non-local  
459 emissions, with the contribution of around 70%. Local emissions in the other four provinces  
460 account for around 60% of the ammonium mass.

461 In order to reduce PM pollution, the cooperation to carry out strict emission mitigation  
462 measures is critical for all provinces, especially with regard to Beijing and Tianjin. In Beijing  
463 and Tianjin, reducing direct emissions of primary aerosols, such as EC and POA, constitutes



the priority, and more efforts need to be made to reduce local emissions of air pollutants in Hebei, Henan, Shandong, and Shanxi.

*Competing interests.* The authors declare no competing financial interest.

*Data availability.* The real-time PM<sub>2.5</sub>, O<sub>3</sub>, NO<sub>2</sub>, SO<sub>2</sub> and CO observations are accessible for the public on the following website: <http://106.37.208.233:20035/> (last access: 24 November 2019) (China MEP, 2013a). One can also access the historic profile of observed ambient pollutants by visiting <http://www.aqistudy.cn/> (last access: 24 November 2019) (China MEP, 2013b).

*Author contribution.* Guohui Li, as the contact author, provided the ideas and financial support, developed the model code, verified the conclusions, and revised the paper. Jiarui Wu conducted a research, designed the experiments, performed the simulation, processed the data, prepared the data visualization, and prepared the manuscript with contributions from all authors. Naifang Bei validated the model performance, analyzed the study data, and reviewed the manuscript. Yuan Wang validated the model performance, verified the results and provided the critical reviews. Suixin Liu provided the data and the primary data process, and reviewed the manuscript. Xia Li, Lang Liu, Ruonan Wang, Jiaoyang Yu and Min Zuo analyzed the initial simulation data, visualized the model results and reviewed the paper. Zhenxing Shen, Junji Cao and Xuexi Tie provided critical reviews pre-publication stage.

*Acknowledgements.* This work is financially supported by the National Key R&D Plan (Quantitative Relationship and Regulation Principle between Regional Oxidation Capacity of Atmospheric and Air Quality (2017YFC0210000)) and National Research Program for Key Issues in Air Pollution Control (DQGG0105).



## References

- An, Z. S., Huang, R. J., Zhang, R. Y., Tie, X. X., Li, G. H., Cao, J. J., Zhou, W. J., Shi, Z. G., Han, Y. M., Gu, Z. L., and Ji, Y. M.: Severe haze in northern China: A synergy of anthropogenic emissions and atmospheric processes, *P. Natl. Acad. Sci. USA.*, 116, 8657-8666, doi: 10.1073/pnas.1900125116, 2019.
- Bei, N. F., Wu, J. R., Elser, M., Feng, T., Cao, J. J., El-Haddad, I., Li, X., Huang, R. J., Li, Z. Q., Long, X., Xing, L., Zhao, S. Y., Tie, X. X., Prevot, A. S. H., and Li, G. H.: Impacts of meteorological uncertainties on the haze formation in Beijing-Tianjin-Hebei (BTH) during wintertime: a case study, *Atmos. Chem. Phys.*, 17, 14579-14591, 10.5194/acp-17-14579-2017, 2017.
- Binkowski, F. S., and Roselle, S. J.: Models-3 community multiscale air quality (CMAQ) model aerosol component - 1. Model description, *J. Geophys. Res. Atmos.*, 108, 18, doi: 10.1029/2001jd001409, 2003.
- Burr, M. J., and Zhang, Y.: Source apportionment of fine particulate matter over the Eastern U.S. Part II: source apportionment simulations using CAMx/PSAT and comparisons with CMAQ source sensitivity simulations, *Atmos. Pollut. Res.*, 2, 318-336, doi: 10.5094/apr.2011.037, 2011.
- Carter, W. P. L.: Development of the SAPRC-07 chemical mechanism, *Atmos. Environ.*, 44, 5324-5335, doi: 10.1016/j.atmosenv.2010.01.026, 2010.
- Chang, X., Wang, S. X., Zhao, B., Xing, J., Liu, X. X., Wei, L., Song, Y., Wu, W. J., Cai, S. Y., Zheng, H. T., Ding, D., and Zheng, M.: Contributions of inter-city and regional transport to PM<sub>2.5</sub> concentrations in the Beijing-Tianjin-Hebei region and its implications on regional joint air pollution control, *Sci. Total Environ.*, 660, 1191-1200, 10.1016/j.scitotenv.2018.12.474, 2019.
- Chen, F., and Dudhia, J.: Coupling an advanced land surface-hydrology model with the Penn State-NCAR MM5 modeling system. Part I: Model implementation and sensitivity, *Mon. Weather. Rev.*, 129, 569-585, doi: 10.1175/1520-0493(2001)129<0569:caalsh>2.0.co;2, 2001.
- China MEP (Ministry of Environmental Protection, China): Air Quality Observation Real-time Release Platform of MEP Data Center, available at: <http://106.37.208.233:20035/> (last access: 24 November 2019), 2013a.
- China MEP (Ministry of Environmental Protection, China): On- line Monitoring and Analysis Platform of China Air Quality, available at: <http://www.aqistudy.cn/> (last access: 24 November 2019), 2013b.
- Chou, M.-D. and Suarez, M. J.: A solar radiation parameterization for atmospheric studies, NASA Tech. Rep. NASA/TM-1999- 10460, Vol. 15, 38 pp., 1999.
- Chou, M.-D. and Suarez, M. J.: A thermal infrared radiation parameterization for atmospheric studies, NASA/TM-2001-104606, Vol. 19, 55 pp., 2001.
- Cooper, J. A., and Watson, J. G.: Receptor oriented methods of air particulate source apportionment, *J. Air. Pollut. Control. Assoc.*, 30, 1116-1125, doi: 10.1080/00022470.1980.10465157, 1980.
- Donahue, N. M., Robinson, A. L., Stanier, C. O., and Pandis, S. N.: Coupled partitioning, dilution, and chemical aging of semivolatile organics, *Environ. Sci. Technol.*, 40,



- 2635-2643, doi: 10.1021/es052297c, 2006.
- Dong, Z., Wang, S., Xing, J., Chang, X., Ding, D., and Zheng, H.: Regional transport in Beijing-Tianjin-Hebei region and its changes during 2014–2017: The impacts of meteorology and emission reduction, *Sci. Total Environ.*, 737, 139792, <https://doi.org/10.1016/j.scitotenv.2020.139792>, 2020.
- Feng, T., Bei, N. F., Huang, R. J., Cao, J. J., Zhang, Q., Zhou, W. J., Tie, X. X., Liu, S. X., Zhang, T., Su, X. L., Lei, W. F., Molina, L. T., and Li, G. H.: Summertime ozone formation in Xi'an and surrounding areas, China, *Atmos. Chem. Phys.*, 16, 4323-4342, doi: 10.5194/acp-16-4323-2016, 2016.
- Foley, K. M., Roselle, S. J., Appel, K. W., Bhawe, P. V., Pleim, J. E., Otte, T. L., Mathur, R., Sarwar, G., Young, J. O., Gilliam, R. C., Nolte, C. G., Kelly, J. T., Gilliland, A. B., and Bash, J. O.: Incremental testing of the Community Multiscale Air Quality (CMAQ) modeling system version 4.7, *Geosci. Model. Dev.*, 3, 205-226, doi: 10.5194/gmd-3-205-2010, 2010.
- Grell, G. A., and Devenyi, D.: A generalized approach to parameterizing convection combining ensemble and data assimilation techniques, *Geophys. Res. Lett.*, 29, 4, doi: 10.1029/2002gl015311, 2002.
- Grell, G. A., Peckham, S. E., Schmitz, R., McKeen, S. A., Frost, G., Skamarock, W. C., and Eder, B.: Fully coupled "online" chemistry within the WRF model, *Atmos. Environ.*, 39, 6957-6975, doi: 10.1016/j.atmosenv.2005.04.027, 2005.
- Guenther, A., Karl, T., Harley, P., Wiedinmyer, C., Palmer, P. I., and Geron, C.: Estimates of global terrestrial isoprene emissions using MEGAN (Model of Emissions of Gases and Aerosols from Nature), *Atmos. Chem. Phys.*, 6, 3181-3210, doi: 10.5194/acp-6-3181-2006, 2006a.
- Guenther, A., Karl, T., Harley, P., Wiedinmyer, C., Palmer, P. I., and Geron, C.: Estimates of global terrestrial isoprene emissions using MEGAN (Model of Emissions of Gases and Aerosols from Nature), *Atmos. Chem. Phys.*, 6, 3181-3210, 2006b.
- Guo, S., Hu, M., Wang, Z. B., Slanina, J., and Zhao, Y. L.: Size-resolved aerosol water-soluble ionic compositions in the summer of Beijing: implication of regional secondary formation, *Atmos. Chem. Phys.*, 10, 947-959, doi: 10.5194/acp-10-947-2010, 2010.
- Guo, S., Hu, M., Zamora, M. L., Peng, J. F., Shang, D. J., Zheng, J., Du, Z. F., Wu, Z., Shao, M., Zeng, L. M., Molina, M. J., and Zhang, R. Y.: Elucidating severe urban haze formation in China, *P. Natl. Acad. Sci. USA.*, 111, 17373-17378, doi: 10.1073/pnas.1419604111, 2014.
- Hess, P. G., Flocke, S., Lamarque, J. F., Barth, M. C., and Madronich, S.: Episodic modeling of the chemical structure of the troposphere as revealed during the spring MLOPEX 2 intensive, *J. Geophys. Res. Atmos.*, 105, 26809-26839, doi: 10.1029/2000jd900253, 2000.
- Hong, S.-Y., and Lim, J.-O. J.: The WRF Single-Moment 6-Class Microphysics Scheme (WSM6), *Asia-Pac. J. Atmos. Sci.*, 42, 129-151, 2006.
- Horowitz, L. W., Walters, S., Mauzerall, D. L., Emmons, L. K., Rasch, P. J., Granier, C., Tie, X. X., Lamarque, J. F., Schultz, M. G., Tyndall, G. S., Orlando, J. J., and Brasseur, G. P.:



- 576 A global simulation of tropospheric ozone and related tracers: Description and  
 577 evaluation of MOZART, version 2, *J. Geophys. Res. Atmos.*, 108, 29, doi:  
 578 10.1029/2002jd002853, 2003.
- 579 Hu, J. L., Wu, L., Zheng, B., Zhang, Q., He, K. B., Chang, Q., Li, X. H., Yang, F. M., Ying,  
 580 Q., and Zhang, H. L.: Source contributions and regional transport of primary particulate  
 581 matter in China, *Environ. Pollut.*, 207, 31-42, doi: 10.1016/j.envpol.2015.08.037, 2015.
- 582 Janjić, Z. I.: Nonsingular Implementation of the Mellor–Yamada Level 2.5 Scheme in the  
 583 NCEP Meso Model, Ncep Office Note, 436, 2002.
- 584 Jiang, C., Wang, H., Zhao, T., Li, T., and Che, H.: Modeling study of PM<sub>2.5</sub> pollutant  
 585 transport across cities in China's Jing-Jin- Ji region during a severe haze episode in  
 586 December 2013, *Atmos. Chem. Phys.*, 15, 5803–5814, doi:10.5194/acp-15-5803-2015,  
 587 2015.
- 588 Lang, J. L., Cheng, S. Y., Li, J. B., Chen, D. S., Zhou, Y., Wei, X., Han, L. H., and Wang, H.  
 589 Y.: A Monitoring and Modeling Study to Investigate Regional Transport and  
 590 Characteristics of PM<sub>2.5</sub> Pollution, *Aerosol. Air. Qual. Res.*, 13, 943-956, doi:  
 591 10.4209/aaqr.2012.09.0242, 2013.
- 592 Li, G., Lei, W., Zavala, M., Volkamer, R., Dusanter, S., Stevens, P., and Molina, L. T.:  
 593 Impacts of HONO sources on the photochemistry in Mexico City during the  
 594 MCMA-2006/MILAGO Campaign, *Atmos. Chem. Phys.*, 10, 6551-6567, doi:  
 595 10.5194/acp-10-6551-2010, 2010.
- 596 Li, G., Bei, N., Tie, X., and Molina, L. T.: Aerosol effects on the photochemistry in Mexico  
 597 City during MCMA-2006/MILAGRO campaign, *Atmos. Chem. Phys.*, 11, 5169-5182,  
 598 doi: 10.5194/acp-11-5169-2011, 2011a.
- 599 Li, G., Zavala, M., Lei, W., Tsimpidi, A. P., Karydis, V. A., Pandis, S. N., Canagaratna, M.  
 600 R., and Molina, L. T.: Simulations of organic aerosol concentrations in Mexico City  
 601 using the WRF-CHEM model during the MCMA-2006/MILAGRO campaign, *Atmos.*  
 602 *Chem. Phys.*, 11, 3789-3809, doi: 10.5194/acp-11-3789-2011, 2011b.
- 603 Li, G. H., Zhang, R. Y., Fan, J. W., and Tie, X. X.: Impacts of black carbon aerosol on  
 604 photolysis and ozone, *J. Geophys. Res. Atmos.*, 110, 10, doi: 10.1029/2005jd005898,  
 605 2005.
- 606 Li, G. H., Bei, N. F., Cao, J. J., Wu, J. R., Long, X., Feng, T., Dai, W. T., Liu, S. X., Zhang,  
 607 Q., and Tie, X. X.: Widespread and persistent ozone pollution in eastern China during  
 608 the non-winter season of 2015: observations and source attributions, *Atmos. Chem.*  
 609 *Phys.*, 17, 2759-2774, doi: 10.5194/acp-17-2759-2017, 2017.
- 610 Li, P. F., Yan, R. C., Yu, S. C., Wang, S., Liu, W. P., and Bao, H. M.: Reinstate regional  
 611 transport of PM<sub>2.5</sub> as a major cause of severe haze in Beijing, *P. Natl. Acad. Sci. USA.*,  
 612 112, E2739-E2740, doi: 10.1073/pnas.1502596112, 2015.
- 613 Li, X., Wu, J. R., Elser, M., Feng, T., Cao, J. J., El-Haddad, I., Huang, R. J., Tie, X. X.,  
 614 Prevot, A. S. H., and Li, G. H.: Contributions of residential coal combustion to the air  
 615 quality in Beijing-Tianjin-Hebei (BTH), China: a case study, *Atmos. Chem. Phys.*, 18,  
 616 10675-10691, 10.5194/acp-18-10675-2018, 2018.
- 617 Lipsky, E. M., and Robinson, A. L.: Effects of dilution on fine particle mass and partitioning  
 618 of semivolatile organics in diesel exhaust and wood smoke, *Environ. Sci. Technol.*, 40,



- 619 155-162, doi: 10.1021/es050319p, 2006.
- 620 Liu, L., Wang, L., Bai, Y., Yang, H., Lin, C., Kong, H., Ma, S., and Wang, J.: Simulation for  
 621 the impacts of regional transport on winter particulate matter levels over Henan based on  
 622 WRF/Chem model, *Acta Scientiae Circumstantiae*, 37, 1843-1854, 2017.
- 623 Long, X., Tie, X. X., Cao, J. J., Huang, R. J., Feng, T., Li, N., Zhao, S. Y., Tian, J., Li, G. H.,  
 624 and Zhang, Q.: Impact of crop field burning and mountains on heavy haze in the North  
 625 China Plain: a case study, *Atmos. Chem. Phys.*, 16, 9675-9691, doi:  
 626 10.5194/acp-16-9675-2016, 2016.
- 627 Marmur, A., Unal, A., Mulholland, J. A., and Russell, A. G.: Optimization-based source  
 628 apportionment of PM<sub>2.5</sub> incorporating gas-to-particle ratios, *Environ. Sci. Technol.*, 39,  
 629 3245-3254, doi: 10.1021/es0490121, 2005.
- 630 Marmur, A., Park, S. K., Mulholland, J. A., Tolbert, P. E., and Russell, A. G.: Source  
 631 apportionment of PM<sub>2.5</sub> in the southeastern United States using receptor and  
 632 emissions-based models: Conceptual differences and implications for time-series health  
 633 studies, *Atmos. Environ.*, 40, 2533-2551, doi: 10.1016/j.atmosenv.2005.12.019, 2006.
- 634 Meng, L., Cai, Z., Li, Y., Hao, J., and Wang, X.: Spatial and Temporal Distributions and  
 635 Source Simulation during Heavy Pollution of PM<sub>2.5</sub> in Tianjin City, *Research of*  
 636 *Environmental Sciences*, 33, 9-17, 2020.
- 637 Nenes, A., Pandis, S. N., and Pilinis, C.: ISORROPIA: A new thermodynamic equilibrium  
 638 model for multiphase multicomponent inorganic aerosols, *Aquat. Geochem.*, 4, 123-152,  
 639 doi: 10.1023/a:1009604003981, 1998.
- 640 Odum, J. R., Hoffmann, T., Bowman, F., Collins, D., Flagan, R. C., and Seinfeld, J. H.:  
 641 Gas/particle partitioning and secondary organic aerosol yields, *Environ. Sci. Technol.*,  
 642 30, 2580-2585, doi: 10.1021/es950943+, 1996.
- 643 Paatero, P., and Tapper, U.: Analysis of different modes of factor-analysis as least-squares fit  
 644 problems, *Chemometrics Intell. Lab. Syst.*, 18, 183-194, doi:  
 645 10.1016/0169-7439(93)80055-m, 1993.
- 646 Pankow, J. F.: An absorption-model of the gas aerosol partitioning involved in the formation  
 647 of secondary organic aerosol, *Atmos. Environ.*, 28, 189-193, doi:  
 648 10.1016/1352-2310(94)90094-9, 1994.
- 649 Robinson, A. L., Donahue, N. M., Shrivastava, M. K., Weitkamp, E. A., Sage, A. M.,  
 650 Grieshop, A. P., Lane, T. E., Pierce, J. R., and Pandis, S. N.: Rethinking organic  
 651 aerosols: Semivolatile emissions and photochemical aging, *Science*, 315, 1259-1262,  
 652 doi: 10.1126/science.1133061, 2007.
- 653 Shrivastava, M. K., Lipsky, E. M., Stanier, C. O., and Robinson, A. L.: Modeling  
 654 semivolatile organic aerosol mass emissions from combustion systems, *Environ. Sci.*  
 655 *Technol.*, 40, 2671-2677, doi: 10.1021/es0522231, 2006.
- 656 Shrivastava, M. K., Lane, T. E., Donahue, N. M., Pandis, S. N., and Robinson, A. L.: Effects  
 657 of gas particle partitioning and aging of primary emissions on urban and regional  
 658 organic aerosol concentrations, *J. Geophys. Res. Atmos.*, 113, 16, doi:  
 659 10.1029/2007jd009735, 2008.
- 660 Sun, Y. L., Chen, C., Zhang, Y. J., Xu, W. Q., Zhou, L. B., Cheng, X. L., Zheng, H. T., Ji, D.  
 661 S., Li, J., Tang, X., Fu, P. Q., and Wang, Z. F.: Rapid formation and evolution of an



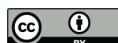

- 662 extreme haze episode in Northern China during winter 2015, *Sci. Rep.*, 6, 9, doi:  
 663 10.1038/srep27151, 2016.
- 664 Tsimpidi, A. P., Karydis, V. A., Zavala, M., Lei, W., Molina, L., Ulbrich, I. M., Jimenez, J.  
 665 L., and Pandis, S. N.: Evaluation of the volatility basis-set approach for the simulation of  
 666 organic aerosol formation in the Mexico City metropolitan area, *Atmos. Chem. Phys.*,  
 667 10, 525-546, doi: 10.5194/acp-10-525-2010, 2010.
- 668 Volkamer, R., Martini, F. S., Molina, L. T., Salcedo, D., Jimenez, J. L., and Molina, M. J.: A  
 669 missing sink for gas-phase glyoxal in Mexico City: Formation of secondary organic  
 670 aerosol, *Geophys. Res. Lett.*, 34, 5, doi: 10.1029/2007gl030752, 2007.
- 671 Wagstrom, K. M., Pandis, S. N., Yarwood, G., Wilson, G. M., and Morris, R. E.:  
 672 Development and application of a computationally efficient particulate matter  
 673 apportionment algorithm in a three-dimensional chemical transport model, *Atmos.*  
 674 *Environ.*, 42, 5650-5659, doi: 10.1016/j.atmosenv.2008.03.012, 2008.
- 675 Wang, L. T., Wei, Z., Wei, W., Fu, J. S., Meng, C. C., and Ma, S. M.: Source apportionment  
 676 of PM<sub>2.5</sub> in top polluted cities in Hebei, China using the CMAQ model, *Atmos. Environ.*,  
 677 122, 723-736, 10.1016/j.atmosenv.2015.10.041, 2015.
- 678 Wang, Q., Luo, K., Fan, J. R., Gao, X., and Cen, K. F.: Spatial Distribution and Multiscale  
 679 Transport Characteristics of PM<sub>2.5</sub> in China, *Aerosol Air Qual. Res.*, 19, 1993-2007,  
 680 10.4209/aaqr.2019.04.0202, 2019.
- 681 Wang, Z. S., Chien, C. J., and Tonnesen, G. S.: Development of a tagged species source  
 682 apportionment algorithm to characterize three-dimensional transport and transformation  
 683 of precursors and secondary pollutants, *J. Geophys. Res. Atmos.*, 114, 17, doi:  
 684 10.1029/2008jd010846, 2009.
- 685 Wesely, M. L.: Parameterization of surface resistances to gaseous dry deposition in  
 686 regional-scale numerical models, *Atmos. Environ.*, 23, 1293-1304, 1989.
- 687 Wu, J. R., Li, G. H., Cao, J. J., Bei, N. F., Wang, Y. C., Feng, T., Huang, R. J., Liu, S. X.,  
 688 Zhang, Q., and Tie, X. X.: Contributions of trans-boundary transport to summertime air  
 689 quality in Beijing, China, *Atmos. Chem. Phys.*, 17, 2035-2051, doi:  
 690 10.5194/acp-17-2035-2017, 2017.
- 691 Wu, J. R., Bei, N. F., Hu, B., Liu, S. X., Wang, Y., Shen, Z. X., Li, X., Liu, L., Wang, R. N.,  
 692 Liu, Z. R., Cao, J. J., Tie, X. X., Molina, L. T., and Li, G. H.: Aerosol-photolysis  
 693 interaction reduces particulate matter during wintertime haze events, *P. Natl. Acad. Sci.*  
 694 *USA*, 117, 9755-9761, 10.1073/pnas.1916775117, 2020.
- 695 Ying, Q., and Kleeman, M. J.: Source contributions to the regional distribution of secondary  
 696 particulate matter in California, *Atmos. Environ.*, 40, 736-752, doi:  
 697 10.1016/j.atmosenv.2005.10.007, 2006.
- 698 Ying, Q., Lu, J., Allen, P., Livingstone, P., Kaduwela, A., and Kleeman, M.: Modeling air  
 699 quality during the California Regional PM<sub>10</sub>/PM<sub>2.5</sub> Air Quality Study (CRPAQS) using  
 700 the UCD/CIT source-oriented air quality model - Part I. Base case model results, *Atmos.*  
 701 *Environ.*, 42, 8954-8966, doi: 10.1016/j.atmosenv.2008.05.064, 2008a.
- 702 Ying, Q., Lu, J., Kaduwela, A., and Kleeman, M.: Modeling air quality during the California  
 703 Regional PM<sub>10</sub>/PM<sub>2.5</sub> Air Quality Study (CPRAQS) using the UCD/CIT Source Oriented  
 704 Air Quality Model - Part II. Regional source apportionment of primary airborne





- 705 particulate matter, *Atmos. Environ.*, 42, 8967-8978, doi:  
 706 10.1016/j.atmosenv.2008.05.065, 2008b.
- 707 Ying, Q., Wu, L., and Zhang, H. L.: Local and inter-regional contributions to PM<sub>2.5</sub> nitrate  
 708 and sulfate in China, *Atmos. Environ.*, 94, 582-592, doi:  
 709 10.1016/j.atmosenv.2014.05.078, 2014.
- 710 Zamora, M. L., Peng, J., Hu, M., Guo, S., Marrero-Ortiz, W., Shang, D., Zheng, J., Du, Z.,  
 711 Wu, Z., and Zhang, R.: Wintertime aerosol properties in Beijing, *Atmos. Chem. Phys.*,  
 712 19, 14329-14338, doi: 10.5194/acp-19-14329-2019, 2019.
- 713 Zhang, H., DeNero, S. P., Joe, D. K., Lee, H. H., Chen, S. H., Michalakes, J., and Kleeman,  
 714 M. J.: Development of a source oriented version of the WRF/Chem model and its  
 715 application to the California regional PM<sub>10</sub>/PM<sub>2.5</sub> air quality study, *Atmos. Chem. Phys.*,  
 716 14, 485-503, doi: 10.5194/acp-14-485-2014, 2014.
- 717 Zhang, H. L., and Ying, Q.: Source apportionment of airborne particulate matter in Southeast  
 718 Texas using a source-oriented 3D air quality model, *Atmos. Environ.*, 44, 3547-3557,  
 719 doi: 10.1016/j.atmosenv.2010.06.004, 2010.
- 720 Zhang, H. L., and Ying, Q.: Secondary organic aerosol formation and source apportionment  
 721 in Southeast Texas, *Atmos. Environ.*, 45, 3217-3227, doi:  
 722 10.1016/j.atmosenv.2011.03.046, 2011.
- 723 Zhang, Q., Streets, D. G., Carmichael, G. R., He, K. B., Huo, H., Kannari, A., Klimont, Z.,  
 724 Park, I. S., Reddy, S., Fu, J. S., Chen, D., Duan, L., Lei, Y., Wang, L. T., and Yao, Z. L.:  
 725 Asian emissions in 2006 for the NASA INTEX-B mission, *Atmos. Chem. Phys.*, 9,  
 726 5131-5153, 2009.
- 727 Zhang, Q., Zheng, Y. X., Tong, D., Shao, M., Wang, S. X., Zhang, Y. H., Xu, X. D., Wang, J.  
 728 N., He, H., Liu, W. Q., Ding, Y. H., Lei, Y., Li, J. H., Wang, Z. F., Zhang, X. Y., Wang,  
 729 Y. S., Cheng, J., Liu, Y., Shi, Q. R., Yan, L., Geng, G. N., Hong, C. P., Li, M., Liu, F.,  
 730 Zheng, B., Cao, J. J., Ding, A. J., Gao, J., Fu, Q. Y., Huo, J. T., Liu, B. X., Liu, Z. R.,  
 731 Yang, F. M., He, K. B., and Hao, J. M.: Drivers of improved PM<sub>2.5</sub> air quality in China  
 732 from 2013 to 2017, *P. Natl. Acad. Sci. USA.*, 116, 24463-24469,  
 733 10.1073/pnas.1907956116, 2019.
- 734 Zhang, R. Y., Guo, S., Zamora, M. L., and Hu, M.: Reply to Li et al.: Insufficient evidence  
 735 for the contribution of regional transport to severe haze formation in Beijing, *P. Natl.*  
 736 *Acad. Sci. USA.*, 112, E2741-E2741, doi: 10.1073/pnas.1503855112, 2015.
- 737 Zheng, B., Tong, D., Li, M., Liu, F., Hong, C. P., Geng, G. N., Li, H. Y., Li, X., Peng, L. Q.,  
 738 Qi, J., Yan, L., Zhang, Y. X., Zhao, H. Y., Zheng, Y. X., He, K. B., and Zhang, Q.:  
 739 Trends in China's anthropogenic emissions since 2010 as the consequence of clean air  
 740 actions, *Atmos. Chem. Phys.*, 18, 14095-14111, 10.5194/acp-18-14095-2018, 2018.
- 741 Zhao, J., Levitt, N. P., Zhang, R. Y., and Chen, J. M.: Heterogeneous reactions of  
 742 methylglyoxal in acidic media: Implications for secondary organic aerosol formation,  
 743 *Environ. Sci. Technol.*, 40, 7682-7687, doi: 10.1021/es060610k, 2006.
- 744  
 745



746 Table 1 WRF-Chem model configurations.

747

|                                                |                                                                                                                                            |
|------------------------------------------------|--------------------------------------------------------------------------------------------------------------------------------------------|
| Region                                         | North China Plain                                                                                                                          |
| Simulation period                              | 05 December 2015 to 04 January 2016                                                                                                        |
| Domain size                                    | 300 × 300                                                                                                                                  |
| Domain center                                  | 38°N, 116°E                                                                                                                                |
| Horizontal resolution                          | 6 km × 6 km                                                                                                                                |
| Vertical resolution                            | 35 vertical levels with a stretched vertical grid with spacing ranging from 30 m near the surface, to 500 m at 2.5 km and 1 km above 14 km |
| Microphysics scheme                            | WSM 6-class graupel scheme (Hong and Lim, 2006)                                                                                            |
| Cumulus scheme                                 | Grell-Devenyi ensemble scheme (Grell and Devenyi, 2002)                                                                                    |
| Boundary layer scheme                          | MYJ TKE scheme (Janjić, 2002)                                                                                                              |
| Surface layer scheme                           | MYJ surface scheme (Janjić, 2002)                                                                                                          |
| Land-surface scheme                            | Unified Noah land-surface model (Chen and Dudhia, 2001)                                                                                    |
| Longwave radiation scheme                      | Goddard longwave scheme (Chou and Suarez, 2001)                                                                                            |
| Shortwave radiation scheme                     | Goddard shortwave scheme (Chou and Suarez, 1999)                                                                                           |
| Meteorological boundary and initial conditions | NCEP 1°×1° reanalysis data                                                                                                                 |
| Chemical initial and boundary conditions       | MOZART 6-hour output (Horowitz et al., 2003)                                                                                               |
| Anthropogenic emission inventory               | Developed by Zhang et al. (2009) and Li et al. (2017), 2012 base year, and SAPRC-99 chemical mechanism                                     |
| Biogenic emission inventory                    | Online MEGAN model developed by Guenther et al. (2006)                                                                                     |

748

749

750

751

752



**753** Table 2 Average PM<sub>2.5</sub> contributions (%) in Beijing, Tianjin, and Hebei under different  
**754** pollution levels from local, the other five provinces, and background source from 05  
**755** December 2015 to 04 January 2016.  
**756**

| Pollution Level ( $\mu\text{g m}^{-3}$ ) | 0-35 | 35-75 | 75-115 | 115-150 | 150-250 | >250 |
|------------------------------------------|------|-------|--------|---------|---------|------|
| <b>Beijing</b>                           |      |       |        |         |         |      |
| Beijing                                  | 56.8 | 55.0  | 48.7   | 40.5    | 35.4    | 25.1 |
| Tianjin                                  | 1.1  | 3.7   | 5.2    | 9.3     | 8.0     | 8.0  |
| Hebei                                    | 16.9 | 20.4  | 24.8   | 28.4    | 28.4    | 21.2 |
| Henan                                    | 1.1  | 1.2   | 1.8    | 1.4     | 3.4     | 6.2  |
| Shandong                                 | 1.1  | 1.2   | 2.0    | 2.4     | 7.1     | 16.4 |
| Shanxi                                   | 2.2  | 3.0   | 3.8    | 2.9     | 4.8     | 2.5  |
| Background                               | 20.8 | 15.4  | 13.8   | 15.1    | 12.8    | 20.6 |
| <b>Tianjin</b>                           |      |       |        |         |         |      |
| Beijing                                  | 21.6 | 7.8   | 5.7    | 5.9     | 7.8     | 8.8  |
| Tianjin                                  | 36.5 | 44.9  | 41.3   | 37.0    | 29.6    | 4.1  |
| Hebei                                    | 23.1 | 28.3  | 30.4   | 31.7    | 30.6    | 27.8 |
| Henan                                    | 0.8  | 1.1   | 1.3    | 2.1     | 3.7     | 6.7  |
| Shandong                                 | 0.8  | 2.0   | 3.6    | 6.2     | 13.9    | 18.0 |
| Shanxi                                   | 0.8  | 1.3   | 1.6    | 2.3     | 3.0     | 4.1  |
| Background                               | 16.5 | 14.6  | 16.0   | 14.9    | 11.4    | 30.5 |
| <b>Hebei</b>                             |      |       |        |         |         |      |
| Beijing                                  | 4.1  | 5.7   | 5.7    | 6.2     | 5.0     | 5.8  |
| Tianjin                                  | 2.7  | 5.2   | 5.3    | 5.5     | 5.4     | 6.7  |
| Hebei                                    | 65.8 | 60.9  | 53.8   | 50.3    | 45.2    | 49.0 |
| Henan                                    | 0.9  | 3.1   | 5.4    | 5.8     | 9.3     | 6.7  |
| Shandong                                 | 0.9  | 5.4   | 11.3   | 12.7    | 18.0    | 18.6 |
| Shanxi                                   | 6.4  | 4.4   | 5.4    | 5.6     | 5.7     | 5.1  |
| Background                               | 19.2 | 15.2  | 13.1   | 13.9    | 11.3    | 8.2  |

**757**  
**758**  
**759**  
**760**  
**761**



Table 3 Same as Table 2, but for Henan, Shandong, and Shanxi.

| Pollution Level ( $\mu\text{g m}^{-3}$ ) | 0-35 | 35-75 | 75-115 | 115-150 | 150-250 | >250 |
|------------------------------------------|------|-------|--------|---------|---------|------|
| <b>Henan</b>                             |      |       |        |         |         |      |
| Beijing                                  | 0.1  | 1.2   | 1.5    | 2.2     | 2.4     | 2.7  |
| Tianjin                                  | 0.2  | 1.2   | 1.5    | 2.3     | 2.3     | 3.1  |
| Hebei                                    | 2.4  | 4.1   | 6.9    | 9.2     | 12.1    | 18.3 |
| Henan                                    | 55.2 | 55.3  | 55.3   | 50.1    | 45.5    | 38.0 |
| Shandong                                 | 2.8  | 6.5   | 11.3   | 13.5    | 13.1    | 20.0 |
| Shanxi                                   | 12.9 | 8.2   | 4.7    | 5.0     | 5.0     | 5.9  |
| Background                               | 26.3 | 23.5  | 18.8   | 17.7    | 19.7    | 11.9 |
| <b>Shandong</b>                          |      |       |        |         |         |      |
| Beijing                                  | 4.2  | 1.8   | 2.7    | 2.4     | 3.0     | 2.2  |
| Tianjin                                  | 3.8  | 2.0   | 3.2    | 2.4     | 3.3     | 2.2  |
| Hebei                                    | 11.8 | 11.5  | 9.6    | 5.5     | 9.6     | 5.2  |
| Henan                                    | 3.5  | 3.5   | 4.4    | 6.1     | 8.6     | 10.1 |
| Shandong                                 | 59.2 | 64.2  | 62.3   | 69.7    | 61.7    | 66.5 |
| Shanxi                                   | 3.8  | 2.6   | 2.8    | 2.5     | 3.6     | 3.4  |
| Background                               | 13.8 | 14.4  | 15.2   | 11.3    | 10.3    | 10.3 |
| <b>Shanxi</b>                            |      |       |        |         |         |      |
| Beijing                                  | 1.3  | 1.6   | 1.6    | 1.2     | /       | /    |
| Tianjin                                  | 1.3  | 1.2   | 1.4    | 1.0     | /       | /    |
| Hebei                                    | 1.8  | 7.2   | 10.3   | 10.0    | /       | /    |
| Henan                                    | 1.8  | 7.9   | 18.0   | 17.7    | /       | /    |
| Shandong                                 | 1.3  | 1.9   | 3.4    | 2.7     | /       | /    |
| Shanxi                                   | 58.7 | 57.8  | 43.8   | 47.7    | /       | /    |
| Background                               | 33.6 | 22.3  | 21.5   | 19.7    | /       | /    |



769 Table 4 Average aerosol constituent contributions (%) in Beijing, Tianjin, and Hebei from  
 770 local, the other five, and background source from 05 December 2015 to 04 January 2016.  
 771

| Species        | EC   | POA  | SOA  | Sulfate | Nitrate | Ammonium |
|----------------|------|------|------|---------|---------|----------|
| <b>Beijing</b> |      |      |      |         |         |          |
| Beijing        | 61.1 | 64.1 | 31.9 | 9.8     | 10.0    | 32.5     |
| Tianjin        | 5.1  | 7.0  | 8.5  | 7.8     | 8.6     | 7.5      |
| Hebei          | 24.9 | 19.0 | 29.1 | 48.0    | 19.1    | 40.8     |
| Henan          | 0.6  | 0.7  | 2.1  | 3.9     | 8.6     | 2.5      |
| Shandong       | 2.3  | 3.2  | 7.1  | 9.8     | 10.5    | 5.0      |
| Shanxi         | 1.3  | 2.1  | 3.5  | 7.8     | 11.0    | 1.7      |
| Background     | 4.6  | 3.9  | 17.7 | 12.7    | 32.1    | 10.0     |
| <b>Tianjin</b> |      |      |      |         |         |          |
| Beijing        | 5.3  | 7.1  | 13.8 | 1.1     | 10.2    | 3.4      |
| Tianjin        | 51.9 | 49.3 | 26.4 | 31.4    | 11.3    | 28.7     |
| Hebei          | 23.7 | 18.7 | 23.8 | 27.7    | 19.4    | 31.5     |
| Henan          | 2.3  | 2.8  | 5.2  | 6.5     | 11.1    | 6.8      |
| Shandong       | 9.8  | 15.3 | 20.7 | 20.3    | 16.7    | 17.5     |
| Shanxi         | 1.3  | 1.5  | 2.6  | 4.4     | 10.6    | 0.8      |
| Background     | 5.9  | 5.3  | 7.5  | 8.6     | 20.6    | 11.2     |
| <b>Hebei</b>   |      |      |      |         |         |          |
| Beijing        | 4.4  | 7.2  | 6.0  | 0.8     | 9.4     | 2.4      |
| Tianjin        | 3.7  | 4.8  | 5.3  | 3.1     | 9.5     | 3.2      |
| Hebei          | 73.8 | 63.0 | 49.4 | 64.3    | 21.3    | 67.4     |
| Henan          | 4.1  | 5.9  | 7.8  | 9.2     | 11.4    | 9.3      |
| Shandong       | 6.5  | 11.4 | 16.7 | 12.6    | 14.6    | 9.7      |
| Shanxi         | 2.4  | 3.0  | 3.2  | 5.0     | 10.8    | 1.2      |
| Background     | 5.0  | 4.8  | 11.6 | 4.9     | 22.9    | 6.9      |

772  
 773  
 774  
 775  
 776



Table 5 Same as Table 4, but for Henan, Shandong, and Shanxi.

| Species         | EC   | POA  | SOA  | Sulfate | Nitrate | Ammonium |
|-----------------|------|------|------|---------|---------|----------|
| <b>Henan</b>    |      |      |      |         |         |          |
| Beijing         | 0.6  | 0.5  | 1.1  | 8.7     | 0.2     | 0.6      |
| Tianjin         | 0.7  | 0.6  | 0.8  | 8.7     | 0.4     | 0.7      |
| Hebei           | 16.5 | 11.9 | 13.9 | 16.7    | 14.4    | 16.5     |
| Henan           | 56.5 | 59.2 | 45.0 | 16.8    | 64.3    | 56.5     |
| Shandong        | 8.6  | 12.1 | 14.4 | 14.9    | 7.9     | 8.6      |
| Shanxi          | 5.4  | 6.1  | 4.9  | 12.1    | 2.0     | 5.4      |
| Background      | 11.7 | 9.5  | 19.8 | 22.0    | 10.8    | 11.7     |
| <b>Shandong</b> |      |      |      |         |         |          |
| Beijing         | 1.0  | 1.0  | 2.1  | 0.2     | 10.1    | 0.5      |
| Tianjin         | 1.1  | 1.0  | 1.4  | 1.0     | 10.5    | 0.8      |
| Hebei           | 7.5  | 4.5  | 6.5  | 7.1     | 16.5    | 7.3      |
| Henan           | 5.1  | 5.1  | 7.9  | 8.7     | 13.8    | 10.2     |
| Shandong        | 71.9 | 78.2 | 60.4 | 68.3    | 24.9    | 62.5     |
| Shanxi          | 1.5  | 1.3  | 2.0  | 3.4     | 11.7    | 0.7      |
| Background      | 11.8 | 8.9  | 19.6 | 11.3    | 12.6    | 18.0     |
| <b>Shanxi</b>   |      |      |      |         |         |          |
| Beijing         | 0.4  | 0.4  | 1.5  | 0.1     | 7.1     | 0.3      |
| Tianjin         | 0.2  | 0.2  | 4.0  | 0.2     | 6.6     | 0.3      |
| Hebei           | 5.3  | 3.2  | 8.6  | 5.5     | 13.7    | 9.3      |
| Henan           | 4.9  | 4.4  | 14.1 | 10.4    | 15.3    | 16.3     |
| Shandong        | 0.7  | 0.8  | 2.5  | 1.3     | 8.5     | 1.8      |
| Shanxi          | 79.8 | 84.1 | 42.1 | 74.7    | 19.4    | 62.2     |
| Background      | 8.8  | 6.8  | 27.1 | 7.8     | 29.5    | 9.7      |



## Figure Captions

784

785

786 Figure 1 WRF-Chem simulation domain with topography. The blue circles represent centers  
 787 of cities with ambient monitoring sites, and the size of circles denotes the number of  
 788 ambient monitoring sites of cities. The red circle denotes observation site for aerosol  
 789 species at the National Center for Nanoscience and Technology (NCNST), Chinese  
 790 Academy of Sciences, Beijing.

791 Figure 2 Conceptual scheme of source apportionment for sulfate aerosols formed from (a)  
 792 homogenous and (b) heterogeneous reactions. *FR*: formation rate; Superscript *i*:  
 793 source number; Superscript *T*: total; Subscript *g*: gas phase; Subscript *a*: aerosol  
 794 phase.

795 Figure 3 Conceptual scheme of source apportionment for nitrate and ammonium aerosols.  
 796 Superscript *i*: source number; Superscript *T*: total; Subscript *g*: gas phase; Subscript *a*:  
 797 aerosol phase.

798 Figure 4 Conceptual scheme of source apportionment for organic aerosols formed from (a)  
 799 homogenous and (b) heterogeneous reactions. Superscript *i*: source number;  
 800 Superscript *T*: total; Subscripts *j* and *k*: volatility bin number; Subscript *g*: gas phase;  
 801 Subscript *a*: aerosol phase. AVOC/BVOC: VOCs emitted from  
 802 anthropogenic/biogenic source; ASVOC/BSVOC: SVOC from oxidation of  
 803 AVOC/BVOC; OPOG: oxidized POG. PSOA: SOA from oxidation and partitioning  
 804 of POA treated as semi-volatile; ASOA/BSOA: SOA from oxidation of  
 805 anthropogenic/biogenic VOCs; HSOA: SOA from irreversible uptake of glyoxal and  
 806 methylglyoxal on aerosol/cloud surfaces.

807 Figure 5 Comparison of observed (black dots) and simulated (solid red lines) diurnal profiles  
 808 of near-surface hourly mass concentrations of (a) PM<sub>2.5</sub>, (b) O<sub>3</sub>, (c) NO<sub>2</sub>, (d) SO<sub>2</sub>, and  
 809 (d) CO averaged at monitoring sites in the NCP from 05 December 2015 to 04  
 810 January 2016.

811 Figure 6 Pattern comparisons of simulated (color counters) vs. observed (colored circles)  
 812 near-surface mass concentrations of (a) PM<sub>2.5</sub>, (b) O<sub>3</sub>, (c) NO<sub>2</sub>, and (d) SO<sub>2</sub> averaged  
 813 from 05 December 2015 to 04 January 2016. The black arrows indicate simulated  
 814 near-surface winds.

815 Figure 7 Comparison of measured (black dots) and simulated (black line) diurnal profiles of  
 816 submicron aerosol species of (a) POA, (b) SOA, (c) sulfate, (d) nitrate, and (e)  
 817 ammonium at NCNST site in Beijing from 05 December 2015 to 04 January 2016.

818 Figure 8 Spatial distribution of average PM<sub>2.5</sub> contributions from (a) Beijing, (b) Tianjin, (c)  
 819 Hebei, (d) Shandong, (e) Henan, and (f) Shanxi provinces from 05 December 2015 to  
 820 04 January 2016.

821 Figure 9 Average PM<sub>2.5</sub> contributions (%) in (a) Beijing, (b) Tianjin, (c) Hebei, (d) Henan, (e)  
 822 Shandong, and (f) Shanxi from local (red) and non-local (blue) emissions from 05  
 823 December 2015 to 04 January 2016 under different pollution levels.

824 Figure 10 Average aerosol constituent contributions (%) in (a) Beijing, (b) Tianjin, (c) Hebei,  
 825 (d) Henan, (e) Shandong, and (f) Shanxi from local (red) and non-local (blue)  
 826 emissions from 05 December 2015 to 04 January 2016.

827

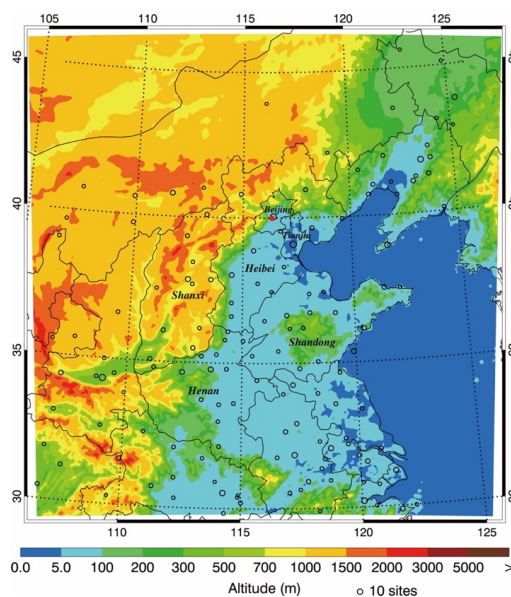

828

829

830 Figure 1 WRF-Chem simulation domain with topography. The circles represent centers of  
 831 cities with ambient monitoring sites, and the size of blue circles denotes the number of  
 832 ambient monitoring sites of cities. The red circle denotes observation site for aerosol species  
 833 at the National Center for Nanoscience and Technology (NCNST), Chinese Academy of  
 834 Sciences, Beijing.

835

836

837

838

839



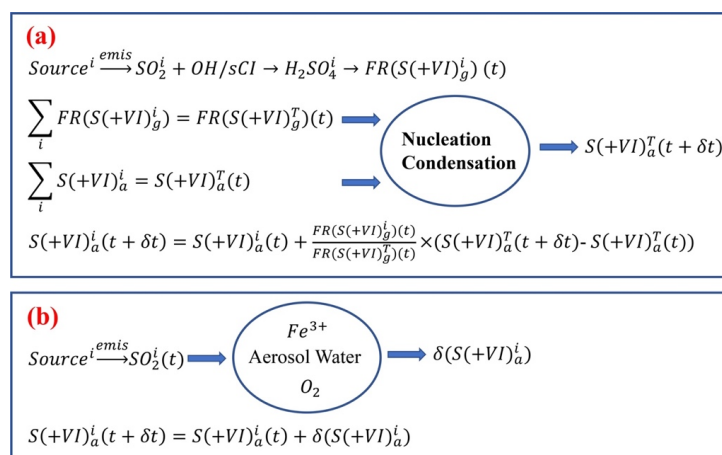

Figure 2 Conceptual scheme of source apportionment for sulfate aerosols formed from (a) homogenous and (b) heterogeneous reactions. *FR*: formation rate; Superscript *i*: source number; Superscript *T*: total; Subscript *g*: gas phase; Subscript *a*: aerosol phase.

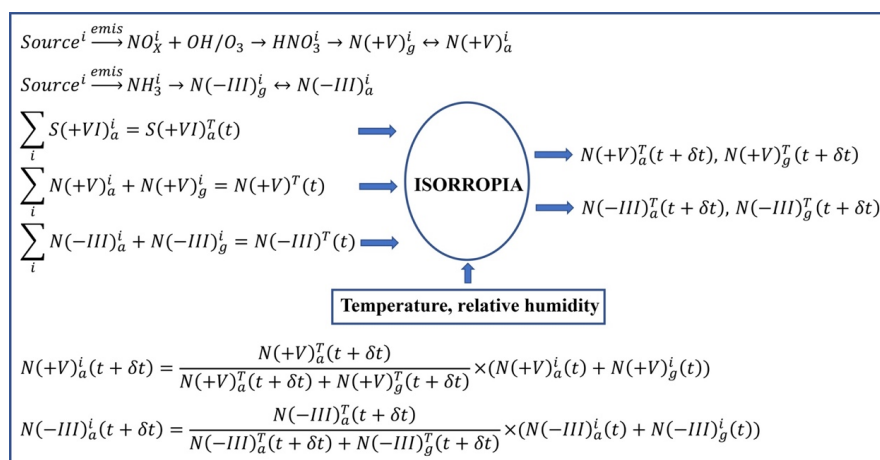

850  
 851  
 852  
 853  
 854  
 855  
 856  
 857  
 858  
 859

Figure 3 Conceptual scheme of source apportionment for nitrate and ammonium aerosols.  
 Superscript *i*: source number; Superscript *T*: total; Subscript *g*: gas phase; Subscript *a*:  
 aerosol phase.

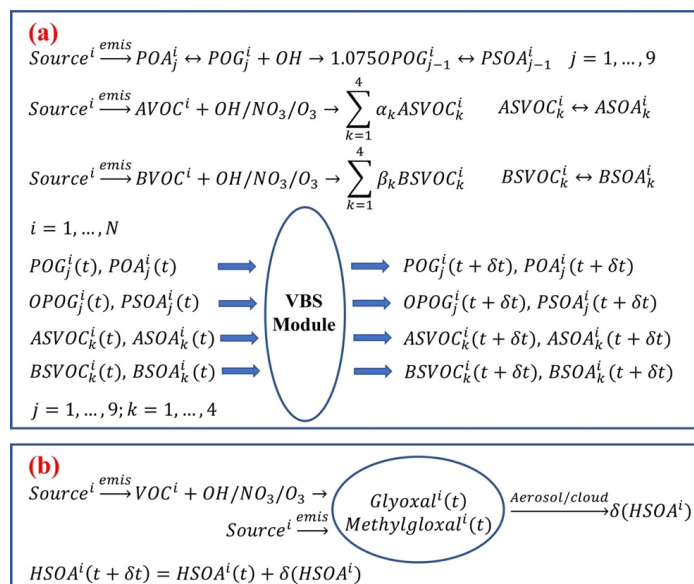

860  
 861  
 862  
 863  
 864  
 865  
 866  
 867  
 868  
 869  
 870  
 871  
 872  
 873  
 874

Figure 4 Conceptual scheme of source apportionment for organic aerosols formed from (a) homogenous and (b) heterogeneous reactions. Superscript  $i$ : source number; Superscript  $T$ : total; Subscripts  $j$  and  $k$ : volatility bin number; Subscript  $g$ : gas phase; Subscript  $a$ : aerosol phase. AVOC/BVOC: VOCs emitted from anthropogenic/biogenic source; ASVOC/BSVOC: SVOC from oxidation of AVOC/BVOC; OPOG: oxidized POG. PSOA: SOA from oxidation and partitioning of POA treated as semi-volatile; ASOA/BSOA: SOA from oxidation of anthropogenic/biogenic VOCs; HSOA: SOA from irreversible uptake of glyoxal and methylglyoxal on aerosol/cloud surfaces.

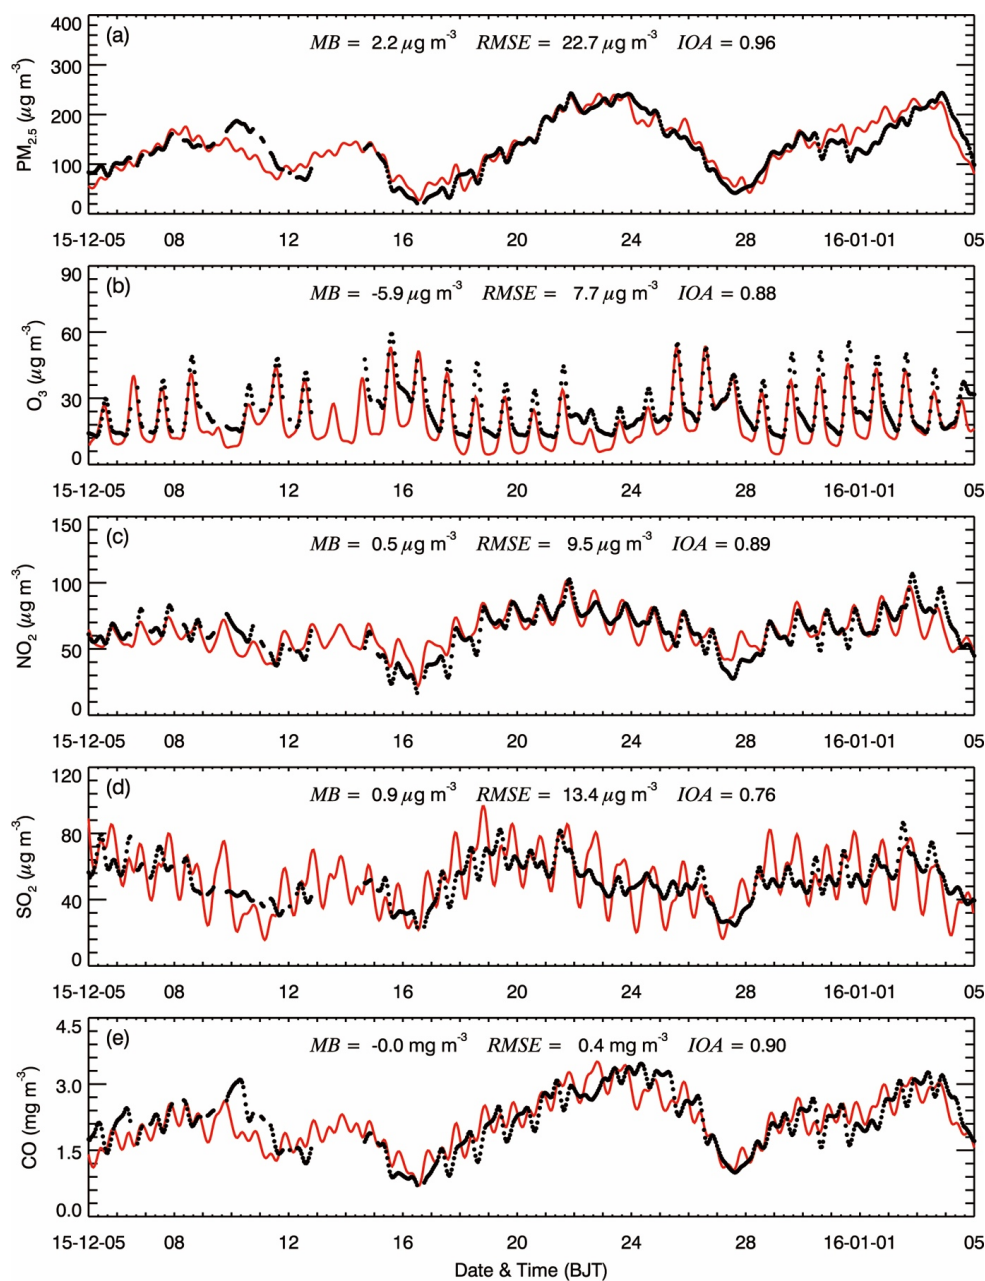

875

876

877 Figure 5 Comparison of observed (black dots) and simulated (solid red lines) diurnal profiles  
 878 of near-surface hourly mass concentrations of (a)  $\text{PM}_{2.5}$ , (b)  $\text{O}_3$ , (c)  $\text{NO}_2$ , (d)  $\text{SO}_2$ , and (d)  $\text{CO}$   
 879 averaged at monitoring sites in the NCP from 05 December 2015 to 04 January 2016.

880

881

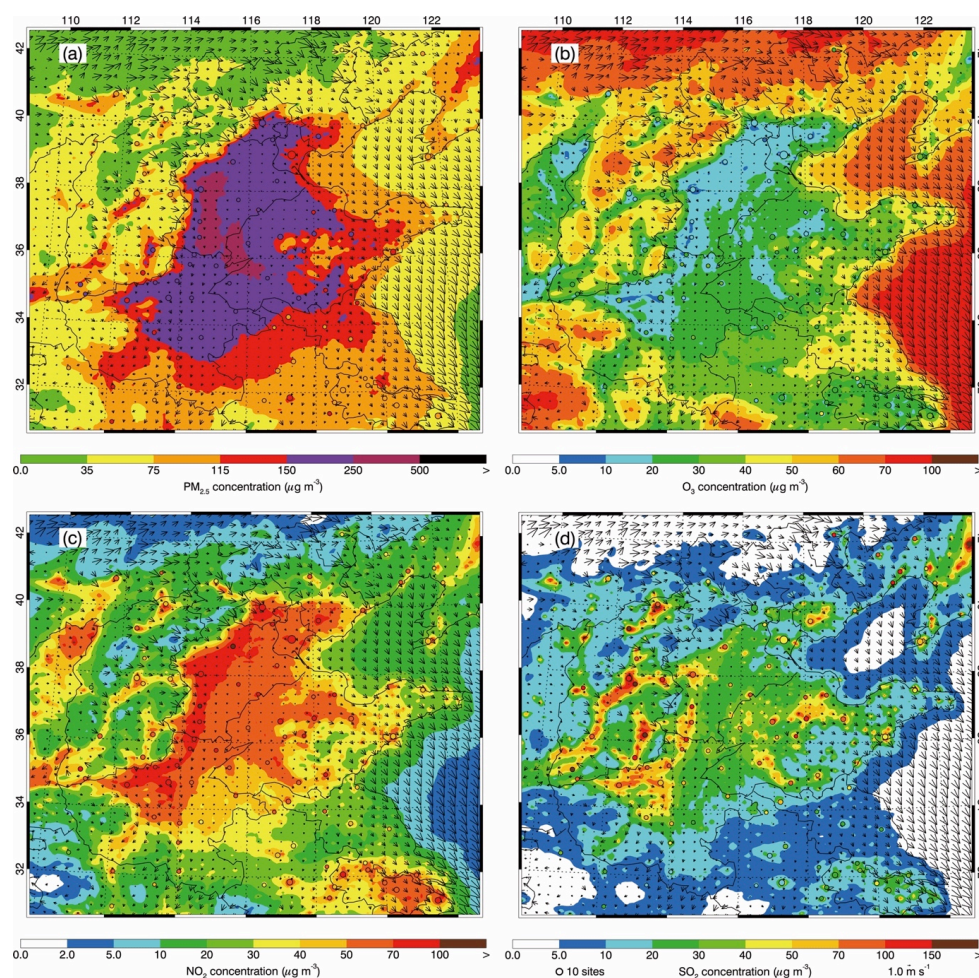

Figure 6 Pattern comparisons of simulated (color counters) vs. observed (colored circles) near-surface mass concentrations of (a) PM<sub>2.5</sub>, (b) O<sub>3</sub>, (c) NO<sub>2</sub>, and (d) SO<sub>2</sub> averaged from 05 December 2015 to 04 January 2016. The black arrows indicate simulated surface winds.



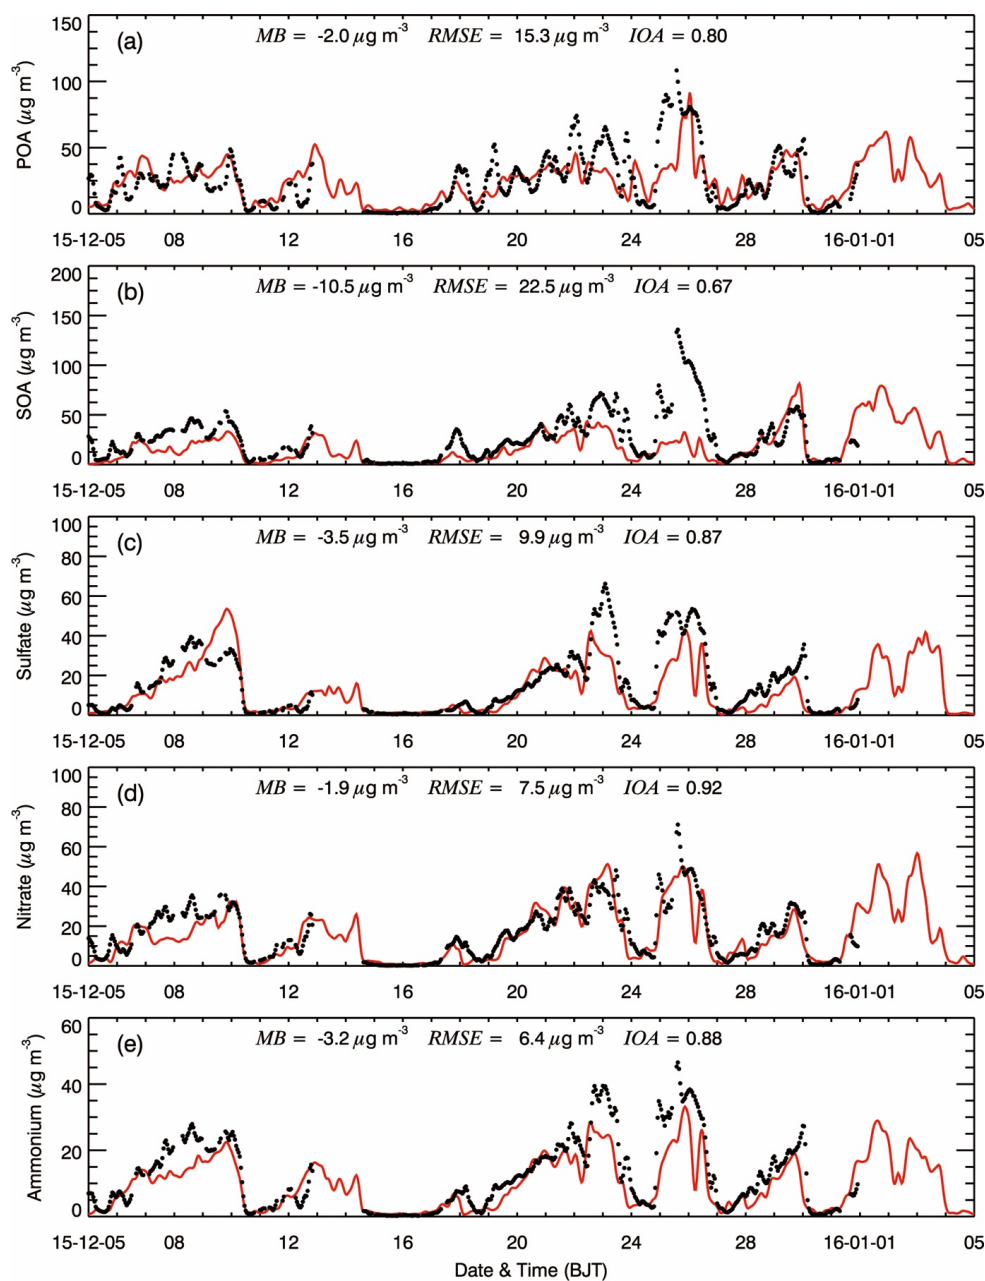

Figure 7 Comparison of measured (black dots) and simulated (black line) diurnal profiles of submicron aerosol species of (a) POA, (b) SOA, (c) sulfate, (d) nitrate, and (e) ammonium at NCNST site in Beijing from 05 December 2015 to 04 January 2016.

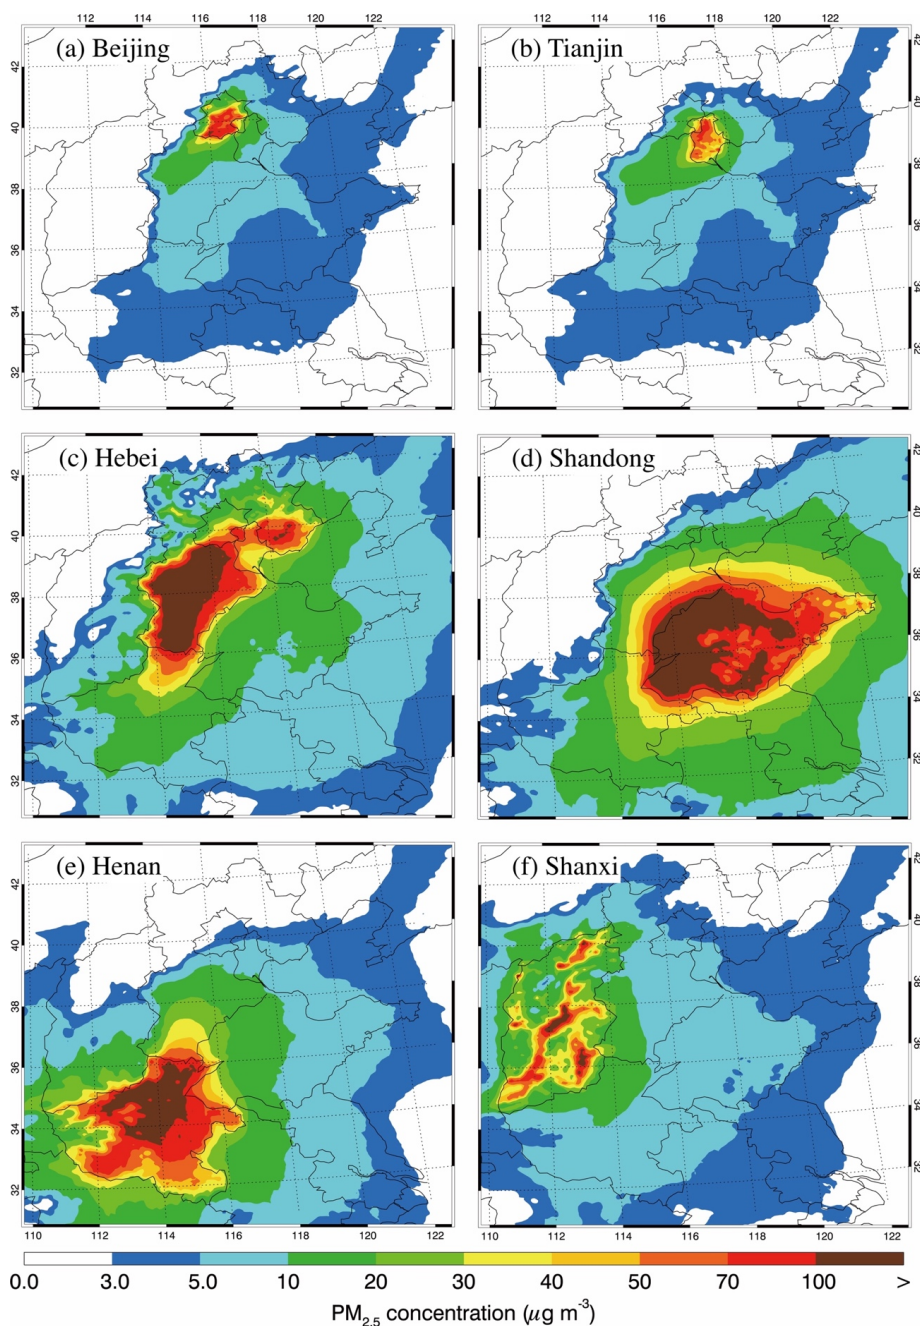

Figure 8 Spatial distribution of average PM<sub>2.5</sub> contributions from (a) Beijing, (b) Tianjin, (c) Hebei, (d) Shandong, (e) Henan, and (f) Shanxi provinces from 05 December 2015 to 04 January 2016.

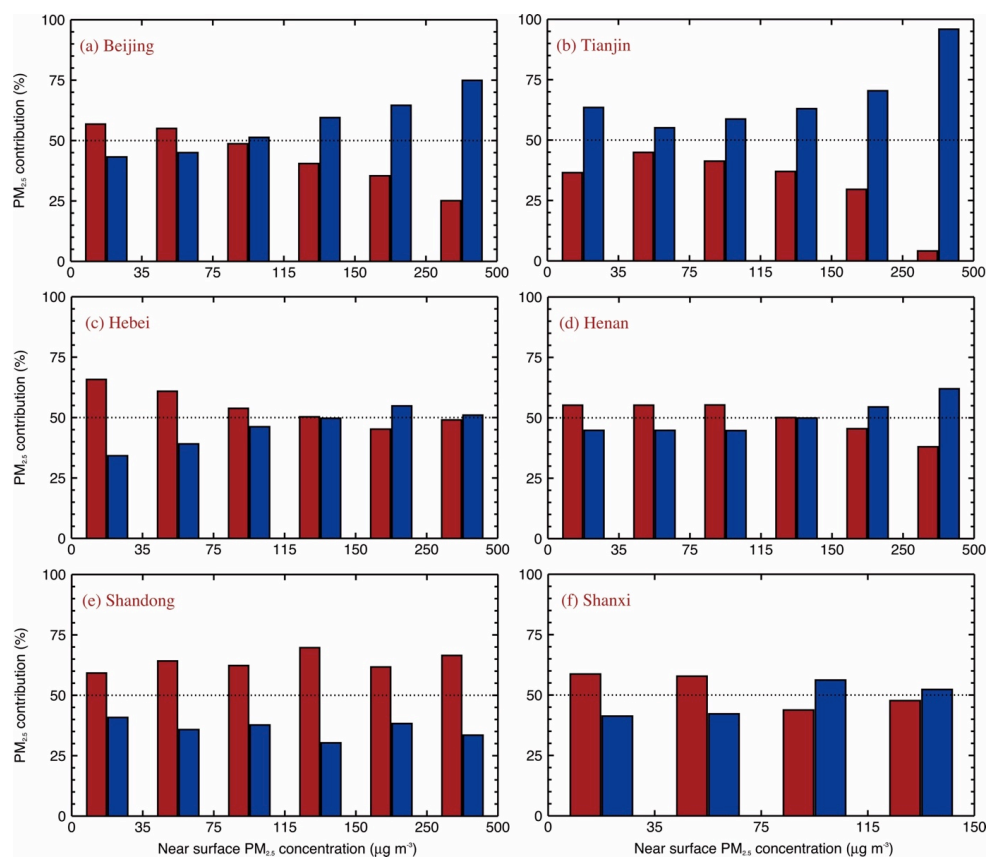

Figure 9 Average PM<sub>2.5</sub> contributions (%) in (a) Beijing, (b) Tianjin, (c) Hebei, (d) Henan, (e) Shandong, and (f) Shanxi from local (red) and non-local (blue) emissions from 05 December 2015 to 04 January 2016 under different pollution levels.



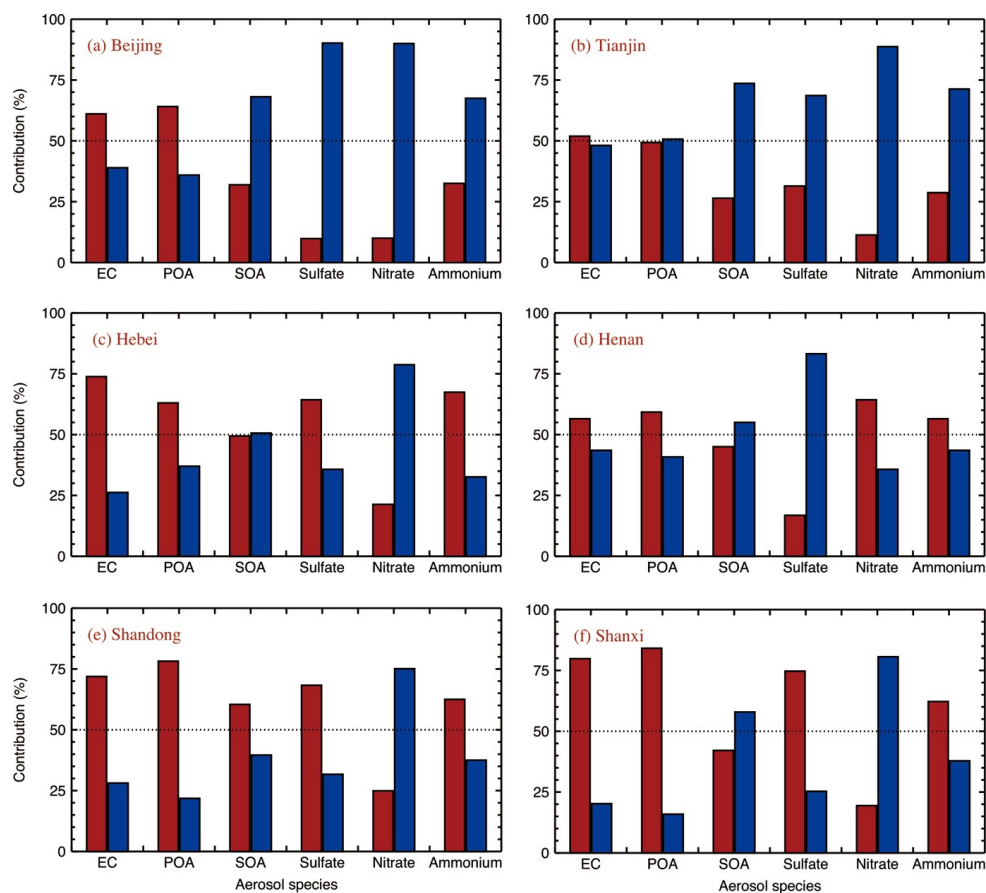

Figure 10 Average aerosol constituent contributions (%) in (a) Beijing, (b) Tianjin, (c) Hebei, (d) Henan, (e) Shandong, and (f) Shanxi from local (red) and non-local (blue) emissions from 05 December 2015 to 04 January 2016.
